# Supplementary material for: Genome-Wide Identification of the Bcl-2 Associated Athanogene (BAG) Gene Family in Solanum lycopersicum and the Functional Role of SlBAG9 in Response to Osmotic Stress
Source: MDPI journal article supplement (doi:10.3390/antiox11030598), 2022-03-21
Supplement: s1 [file s1]

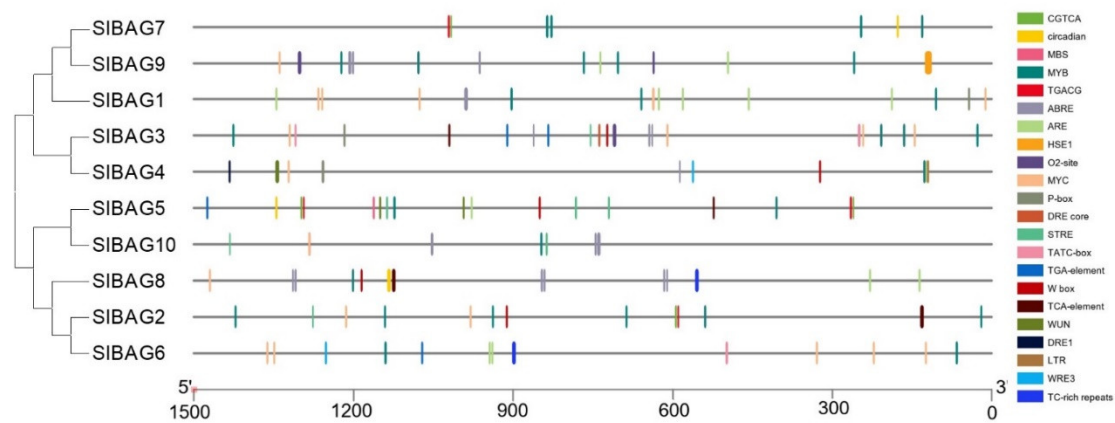

**Figure S1.** Cis-elements components in the promoters of tomato *SIBAG* genes. The putative cis-regulatory elements of 1500 bp upstream of *SIBAG* genes were predicted using PlantCARE program (<http://bioinformatics.psb.ugent.be/webtools/plantcare/html/>), which were visualized by TBtools. All putative cis-regulatory elements of *SIBAG* genes were listed in Additional Table S3.

#### Promoter cis-elements analysis

In order to analyze the cis-elements that might be involved in regulating the expression of *SIBAG* genes, the 1.5 kb of 5' flanking region upstream of each *SIBAG* gene was selected and analyzed using PlantCARE tool. The promoters of all ten *SIBAG* genes contained different cis-elements for plant growth regulation, stress responses, hormone responses, and light responses (Figure S1; Table S3). For example, MYB, a stress-responsive cis-element, was the most abundant element, which was detected in all *SIBAG* genes. DRE (Drought responsiveness) only existed in the promoters of *SIBAG3* and *SIBAG4*. HSE (heat shock element) and LTR (low-temperature responsiveness) only existed in the promoters of *SIBAG9* and *SIBAG4*, respectively. Hormone response elements specific to jasmonic acid (JA), abscisic acid (ABA), salicylic acid (SA) and gibberellin acid (GA) were found upstream of several *SIBAG* genes (Figure S1). ABA-responsive elements (ABREs) were the most abundant elements, while *SIBAG2*, *SIBAG5*, *SIBAG6*, and *SIBAG7* had no this element. Eight MeJA-responsive elements (CGTCA-motif and TGACG-motif) were detected in *SIBAG2*, *SIBAG5*, and *SIBAG7*. Six GA-responsive elements (P-box and TATC-box) were found in *SIBAG1*, *SIBAG3*, *SIBAG4*, and *SIBAG6*. Four SA responsiveness (TCA-element) were found in *SIBAG2*, *SIBAG3*, *SIBAG5*, and *SIBAG8*. The data here suggested that *SIBAG* genes might function in the plant growth, stress, and hormone responses.
