# Supplementary material for: Genome-Wide Identification of the Bcl-2 Associated Athanogene (BAG) Gene Family in Solanum lycopersicum and the Functional Role of SlBAG9 in Response to Osmotic Stress
Source: MDPI journal article supplement (doi:10.3390/antiox11030598), 2022-03-21
Supplement: s1 [file s1]

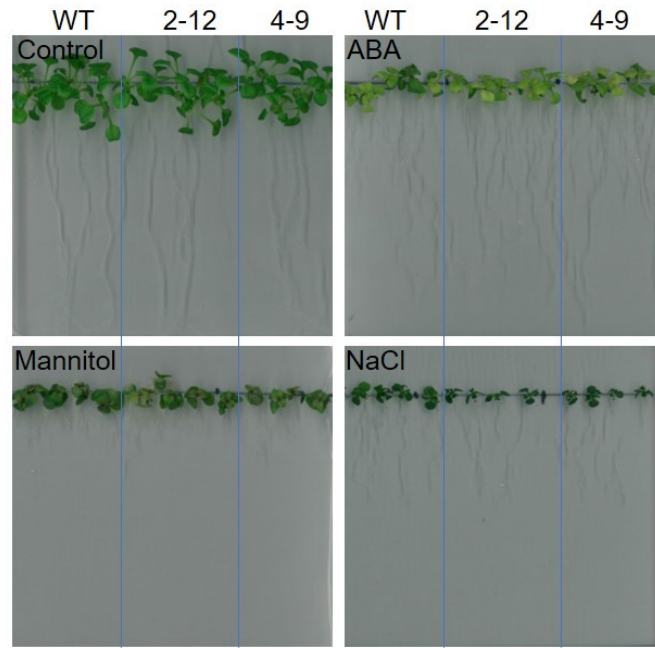

**Figure S2.** The increased sensitivity of *SIBAG9*-overexpressing *Arabidopsis* exposed to mannitol, NaCl, and ABA stress. Seven-day-old seedlings grown on the 1/2 MS media were transferred to 1/2 MS media supplemented with 0, 300 mM mannitol, 175 mM NaCl, or 1.5  $\mu$ M ABA and vertically grew for 14 days.
