# Supplementary material for: Genome-Wide Identification of the Bcl-2 Associated Athanogene (BAG) Gene Family in Solanum lycopersicum and the Functional Role of SlBAG9 in Response to Osmotic Stress
Source: Antioxidants (Basel). 2022 Mar 21;11(3):598. doi: 10.3390/antiox11030598 (PMC8945447; doi:10.3390/antiox11030598)
Supplement: Supplementary file 1 [file antioxidants-11-00598-s001.zip › Supplementary tables .xlsx]

## Sheet: Table S1
TableS1 Primers used in this study for qPCR analysis
Primers	Sequence(5'-3')
Tomato
B1F	ACCATCACAGGAAAAGGCAATCA
B1R	AGCGATTGTTCTACTGGTTTTCATT
B2F	CAGCAGCATCAGCGTAGGTA
B2R	TTTCGCTGGTGTAGGCGAAT
B3F	ATGCCAGATGGTGCCATTCA
B3R	TCCTTCAAAGGTCTCGGCAC
B4F	GGCGATGAACTAGAGGCGTT
B4R	TCATTGATCGCGGAGAAACCT
B5F	TGGAAGATCCAGCCAGCAAA
B5R	CGACCTCTACTCTTACGCGG
B6F	AAATGAGTGGGAGCTGAGGC
B6R	CTTGACCCGGACCCGAATAG
B7F	GGTGGAAGATGTTGAGCGGA
B7R	ATCAGCGTCTCATTCACCCG
B8F	TGCCAAAGTGTCAATGAAGCA
B8R	GCCCTGGGCTTTTCTCATCA
B9F	TCGGTCCACGAGAAATCTGC
B9R	CTGGATCGGAACTGACGGAG
B10F	ATGCCCCATCTGCTAGACCT
B10R	AGTCACTATAGTAGTGGGCGGT
UBIF	GGACGGACGTACTCTAGCTGAT
UBIR	AGCTTTCGACCTCAAGGGTA
EF1F	GGAACTTGAGAAGGAGCCTAAG
EF1R	CAACACCAACAGCAACAGTCT
Arabidopsi
ABI3F	ACGGGAGGGACCTGGATGTAT
ABI3R	CCGGCAAGTGTGTCTCAGCT
RD29AF	ACGTCGAGACCCCGATAAC
RD29AR	CAATCTCCGGTACTCCTCCA
DREB2AF	AAGGTAAAGGAGGACCAGAG
DREB2AR	ACACAACCAGGAGTCTCAAC
P5CS1F	AAGGCTTGTGATACGGATATGG
P5CS1R	ATGCACAAGAAGGGTTTCCA
FSD1F	GCTCGGCTCTTTCCCATTGC
FSD1R	CAGCTTCCCAAGACACAAGATTGG
CAT1F	CGCCATGCCGAAAAATACCC
CAT1R	CTTGCCTGTCTGAATCCCAGGAC
AtACTINF	GGTAACATTGTGCTCAGTGGT
AtACTINR	GCATCAATTCGATCACTCAGAG

## Sheet: Table S2
	Table S2 Information of 10 SlBAG genes from multiple data sources
Name	Gene Identifier	Data source	Peptide sequence	CDS sequence	Transcript sequence	Genomic sequence
SlBAG1	Solyc01g095320	This study	1235	3708	4127	4565
		Irfan et al. 2021	972		3622	4897
		ITAG2.4	972	2919	3153	4897
		ITAG3.2	1235	3708	4039	4477
		ITAG4.0	1157	3474	3805	5040
SlBAG2	Solyc03g026220	This study	341	1026	1958	2235
		Irfan et al. 2021	341		1685	1962
		ITAG2.4	341	1026	1685	1962
		ITAG3.2	341	1026	1903	2180
		ITAG4.0	341	1026	2977	3255
SlBAG3	Solyc03g083970	This study	395	1188	1661	2785
		Irfan et al. 2021	395		1661	2837
		ITAG2.4	395	1188	1661	2837
		ITAG3.2	395	1188	2116	3292
		ITAG4.0	395	1188	1661	2837
SlBAG4	Solyc04g014740	This study	216	651	850	1405
		Irfan et al. 2021	99		300	300
		ITAG2.4	99	300	300	300
		ITAG3.2	242	729	841	2836
		ITAG4.0	99	300	300	300
SlBAG5	Solyc06g007240	This study	278	837	1118	3458
		Irfan et al. 2021	278		1069	3409
		ITAG2.4	278	837	1069	3409
		ITAG3.2	244	735	820	3262
		ITAG4.0	281	846	1068	3411
SlBAG6	Solyc06g035720	This study	333	1002	1665	3038
		Irfan et al. 2021	330		1492	3369
		ITAG2.4	330	993	1492	3369
		ITAG3.2	333	1002	2134	3507
		ITAG4.0	333	1002	1506	3384
SlBAG7	Solyc06g072430	This study	373	1122	1122	1122
		Irfan et al. 2021	373		1122	1122
		ITAG2.4	373	1122	1122	1122
		ITAG3.2	298	897	897	1148
		ITAG4.0	373	1122	1122	1122
SlBAG8	Solyc08g080320	This study	284	855	1469	2785
		Irfan et al. 2021	276		1007	2323
		ITAG2.4	276	831	1007	2323
		ITAG3.2	284	855	3055	4371
		ITAG4.0	284	855	1007	2321
SlBAG9	Solyc10g084170	This study	170	513	513	513
		Irfan et al. 2021	170		513	513
		ITAG2.4	170	513	513	513
		ITAG3.2	170	513	513	513
		ITAG4.0	170	513	513	513
SlBAG10	Solyc10g085290	This study	394	1185	1495	5002
		Irfan et al. 2021	349		1050	4692
		ITAG2.4	349	1050	1050	4692
		ITAG3.2	394	1185	1714	5221
		ITAG4.0	349	1050	1185	4828

## Sheet: Table S3
	Table S3 The cis-element of SlBAG genes promoter
Name	Element		Site	Size	Positive/Nagtive	Description
Solyc01g095320	Unnamed__6	taTAAATATct	147	10	-	Zea mays
Solyc01g095320	GT1-motif	GGTTAA	594	6	-	Arabidopsis thaliana	light responsive element
Solyc01g095320	CAAT-box	CAAT	55	4	-	Nicotiana glutinosa
Solyc01g095320	CAAT-box	CAAAT	60	5	-	Pisum sativum	common cis-acting element in promoter and enhancer regions
Solyc01g095320	CAAT-box	CAAAT	78	5	+	Pisum sativum	common cis-acting element in promoter and enhancer regions
Solyc01g095320	CAAT-box	CAAT	90	4	-	Nicotiana glutinosa
Solyc01g095320	CAAT-box	CAAT	178	4	-	Nicotiana glutinosa
Solyc01g095320	CAAT-box	CAAT	209	4	-	Nicotiana glutinosa
Solyc01g095320	CAAT-box	CAAT	407	4	+	Nicotiana glutinosa
Solyc01g095320	CAAT-box	CAAAT	427	5	+	Pisum sativum	common cis-acting element in promoter and enhancer regions
Solyc01g095320	CAAT-box	CAAAT	476	5	+	Pisum sativum	common cis-acting element in promoter and enhancer regions
Solyc01g095320	CAAT-box	TGCCAAC	491	7	+	Petunia hybrida	common cis-acting element in promoter and enhancer regions
Solyc01g095320	CAAT-box	CAAT	687	4	-	Nicotiana glutinosa
Solyc01g095320	CAAT-box	CAAAT	773	5	-	Pisum sativum	common cis-acting element in promoter and enhancer regions
Solyc01g095320	CAAT-box	CAAT	786	4	-	Nicotiana glutinosa
Solyc01g095320	CAAT-box	CAAAT	794	5	-	Pisum sativum	common cis-acting element in promoter and enhancer regions
Solyc01g095320	CAAT-box	CCAAT	814	5	-	Arabidopsis thaliana	common cis-acting element in promoter and enhancer regions
Solyc01g095320	CAAT-box	CAAT	915	4	-	Nicotiana glutinosa
Solyc01g095320	CAAT-box	CAAT	940	4	-	Nicotiana glutinosa
Solyc01g095320	CAAT-box	CAAT	1020	4	-	Nicotiana glutinosa
Solyc01g095320	CAAT-box	CAAT	1066	4	+	Nicotiana glutinosa
Solyc01g095320	CAAT-box	CAAAT	1121	5	-	Pisum sativum	common cis-acting element in promoter and enhancer regions
Solyc01g095320	CAAT-box	CAAAT	1134	5	+	Pisum sativum	common cis-acting element in promoter and enhancer regions
Solyc01g095320	CAAT-box	CAAT	1139	4	+	Nicotiana glutinosa
Solyc01g095320	CAAT-box	CAAT	1173	4	-	Nicotiana glutinosa
Solyc01g095320	CAAT-box	CAAT	1202	4	+	Nicotiana glutinosa
Solyc01g095320	CAAT-box	CAAT	1303	4	-	Nicotiana glutinosa
Solyc01g095320	CAAT-box	CAAAT	1475	5	-	Pisum sativum	common cis-acting element in promoter and enhancer regions
Solyc01g095320	CAAT-box	CAAAT	1487	5	-	Pisum sativum	common cis-acting element in promoter and enhancer regions
Solyc01g095320	CCGTCC motif	CCGTCC	817	6	-	Nicotiana tabacum
Solyc01g095320	AE-box	AGAAACAA	467	8	+	Arabidopsis thaliana	part of a module for light response
Solyc01g095320	ACTCATCCT sequence	ACTCATCCT	1151	9	-	Arabidopsis thaliana
Solyc01g095320	AAGAA-motif	gGTAAAGAAA	311	9	-	Avena sativa
Solyc01g095320	AAGAA-motif	GAAAGAA	831	7	-	Avena sativa
Solyc01g095320		motif_sequence	42	4	+	organism	short_function
Solyc01g095320		motif_sequence	214	4	-	organism	short_function
Solyc01g095320		motif_sequence	535	4	-	organism	short_function
Solyc01g095320		motif_sequence	550	4	+	organism	short_function
Solyc01g095320		motif_sequence	767	4	-	organism	short_function
Solyc01g095320		motif_sequence	1114	4	+	organism	short_function
Solyc01g095320		motif_sequence	1317	4	+	organism	short_function
Solyc01g095320		motif_sequence	1343	4	-	organism	short_function
Solyc01g095320		motif_sequence	1407	4	+	organism	short_function
Solyc01g095320	Myb	TAACTG	839	6	+	Arabidopsis thaliana
Solyc01g095320	CCGTCC-box	CCGTCC	817	6	-	Petroselinum hortense
Solyc01g095320	Myc	TCTCTTA	861	7	+	Arabidopsis thaliana
Solyc01g095320	Unnamed__1	CGTGG	369	5	-	Zea mays
Solyc01g095320	Unnamed__1	CGTGG	1421	5	+	Zea mays
Solyc01g095320	TATA-box	TATA	1	4	+	Arabidopsis thaliana	core promoter element around -30 of transcription start
Solyc01g095320	TATA-box	ATTATA	70	6	+	Brassica napus	core promoter element around -30 of transcription start
Solyc01g095320	TATA-box	TATATAA	71	7	-	Arabidopsis thaliana	core promoter element around -30 of transcription start
Solyc01g095320	TATA-box	TATATA	72	6	+	Arabidopsis thaliana	core promoter element around -30 of transcription start
Solyc01g095320	TATA-box	TATA	74	4	+	Arabidopsis thaliana	core promoter element around -30 of transcription start
Solyc01g095320	TATA-box	TATAAAA	229	7	-	Pisum sativum	core promoter element around -30 of transcription start
Solyc01g095320	TATA-box	TATAAA	230	6	-	Helianthus annuus	core promoter element around -30 of transcription start
Solyc01g095320	TATA-box	TATAA	231	5	-	Arabidopsis thaliana	core promoter element around -30 of transcription start
Solyc01g095320	TATA-box	TATA	232	4	+	Arabidopsis thaliana	core promoter element around -30 of transcription start
Solyc01g095320	TATA-box	taTATAAAtc	329	9	-	Arabidopsis thaliana	core promoter element around -30 of transcription start
Solyc01g095320	TATA-box	TATAAAT	330	7	-	Brassica juncea	core promoter element around -30 of transcription start
Solyc01g095320	TATA-box	TATAAA	331	6	-	Helianthus annuus	core promoter element around -30 of transcription start
Solyc01g095320	TATA-box	TATATAA	332	7	-	Arabidopsis thaliana	core promoter element around -30 of transcription start
Solyc01g095320	TATA-box	TATATA	333	6	+	Arabidopsis thaliana	core promoter element around -30 of transcription start
Solyc01g095320	TATA-box	ATATAA	334	6	+	Brassica oleracea	core promoter element around -30 of transcription start
Solyc01g095320	TATA-box	TATA	335	4	+	Arabidopsis thaliana	core promoter element around -30 of transcription start
Solyc01g095320	TATA-box	TATACA	457	6	-	Helianthus annuus	core promoter element around -30 of transcription start
Solyc01g095320	TATA-box	TATA	459	4	+	Arabidopsis thaliana	core promoter element around -30 of transcription start
Solyc01g095320	TATA-box	ATATAA	652	6	+	Brassica oleracea	core promoter element around -30 of transcription start
Solyc01g095320	TATA-box	TATA	653	4	+	Arabidopsis thaliana	core promoter element around -30 of transcription start
Solyc01g095320	TATA-box	TATAAAA	717	7	-	Pisum sativum	core promoter element around -30 of transcription start
Solyc01g095320	TATA-box	TATAAA	718	6	-	Helianthus annuus	core promoter element around -30 of transcription start
Solyc01g095320	TATA-box	TATAA	719	5	-	Arabidopsis thaliana	core promoter element around -30 of transcription start
Solyc01g095320	TATA-box	TATA	720	4	+	Arabidopsis thaliana	core promoter element around -30 of transcription start
Solyc01g095320	TATA-box	TATAA	855	5	-	Arabidopsis thaliana	core promoter element around -30 of transcription start
Solyc01g095320	TATA-box	TATA	856	4	-	Arabidopsis thaliana	core promoter element around -30 of transcription start
Solyc01g095320	TATA-box	TATAA	963	5	-	Arabidopsis thaliana	core promoter element around -30 of transcription start
Solyc01g095320	TATA-box	TATA	964	4	-	Arabidopsis thaliana	core promoter element around -30 of transcription start
Solyc01g095320	TATA-box	TATA	1079	4	-	Arabidopsis thaliana	core promoter element around -30 of transcription start
Solyc01g095320	TATA-box	taTATAAAtc	1095	9	-	Arabidopsis thaliana	core promoter element around -30 of transcription start
Solyc01g095320	TATA-box	TATAAAT	1096	7	-	Brassica juncea	core promoter element around -30 of transcription start
Solyc01g095320	TATA-box	TATAAA	1097	6	-	Helianthus annuus	core promoter element around -30 of transcription start
Solyc01g095320	TATA-box	TATATAA	1098	7	-	Arabidopsis thaliana	core promoter element around -30 of transcription start
Solyc01g095320	TATA-box	TATATA	1099	6	-	Arabidopsis thaliana	core promoter element around -30 of transcription start
Solyc01g095320	TATA-box	ATATAA	1100	6	+	Brassica oleracea	core promoter element around -30 of transcription start
Solyc01g095320	TATA-box	TATA	1101	4	-	Arabidopsis thaliana	core promoter element around -30 of transcription start
Solyc01g095320	TATA-box	TATA	1107	4	-	Arabidopsis thaliana	core promoter element around -30 of transcription start
Solyc01g095320	TATA-box	ATATAA	1126	6	+	Brassica oleracea	core promoter element around -30 of transcription start
Solyc01g095320	TATA-box	TATA	1127	4	-	Arabidopsis thaliana	core promoter element around -30 of transcription start
Solyc01g095320	TATA-box	ATATAA	1209	6	+	Brassica oleracea	core promoter element around -30 of transcription start
Solyc01g095320	TATA-box	TATA	1210	4	-	Arabidopsis thaliana	core promoter element around -30 of transcription start
Solyc01g095320	TATA-box	TATAA	1232	5	-	Arabidopsis thaliana	core promoter element around -30 of transcription start
Solyc01g095320	TATA-box	TATA	1233	4	-	Arabidopsis thaliana	core promoter element around -30 of transcription start
Solyc01g095320	TATA-box	TATA	1286	4	-	Arabidopsis thaliana	core promoter element around -30 of transcription start
Solyc01g095320	TATA-box	TATATA	1450	6	-	Arabidopsis thaliana	core promoter element around -30 of transcription start
Solyc01g095320	TATA-box	TATA	1452	4	-	Arabidopsis thaliana	core promoter element around -30 of transcription start
Solyc01g095320	G-box	ACACGTGT	509	8	+	Brassica napus	cis-acting regulatory element involved in light responsiveness
Solyc01g095320	G-box	CACGTG	510	6	+	Arabidopsis thaliana	cis-acting regulatory element involved in light responsiveness
Solyc01g095320	MYB-like sequence	TAACCA	595	6	+	Arabidopsis thaliana
Solyc01g095320	Sp1	GGGCGG	33	6	-	Oryza sativa	light responsive element
Solyc01g095320	MYC	CATGTG	237	6	-	Arabidopsis thaliana
Solyc01g095320	MYC	CATGTG	239	6	+	Arabidopsis thaliana
Solyc01g095320	MYC	CATTTG	427	6	-	Arabidopsis thaliana
Solyc01g095320	MYC	CATTTG	1486	6	+	Arabidopsis thaliana
Solyc01g095320	P-box	CCTTTTG	1460	7	-	Oryza sativa	gibberellin-responsive element
Solyc01g095320	A-box	CCGTCC	817	6	-	Petroselinum crispum	cis-acting regulatory element
Solyc01g095320	silencer	ATTAAAAGTTAAAAACACA	383	18	+	Phaseolus vulgaris	GT-1 factor binding site
Solyc01g095320	Box 4	ATTAAT	4	6	+	Petroselinum crispum	part of a conserved DNA module involved in light responsiveness
Solyc01g095320	ARE	AAACCA	158	6	-	Zea mays	cis-acting regulatory element essential for the anaerobic induction
Solyc01g095320	ARE	AAACCA	877	6	-	Zea mays	cis-acting regulatory element essential for the anaerobic induction
Solyc01g095320	ARE	AAACCA	922	6	-	Zea mays	cis-acting regulatory element essential for the anaerobic induction
Solyc01g095320	ARE	AAACCA	1046	6	-	Zea mays	cis-acting regulatory element essential for the anaerobic induction
Solyc01g095320	ARE	AAACCA	1310	6	+	Zea mays	cis-acting regulatory element essential for the anaerobic induction
Solyc01g095320	ERE	ATTTCATA	1204	8	+	Nicotiana glutinos
Solyc01g095320	AT~TATA-box	TATATA	72	6	+	Arabidopsis thaliana
Solyc01g095320	AT~TATA-box	TATATAAA	331	8	-	Arabidopsis thaliana
Solyc01g095320	AT~TATA-box	TATATA	333	6	+	Arabidopsis thaliana
Solyc01g095320	AT~TATA-box	TATATAAA	1097	8	-	Arabidopsis thaliana
Solyc01g095320	AT~TATA-box	TATATA	1099	6	-	Arabidopsis thaliana
Solyc01g095320	AT~TATA-box	TATATA	1450	6	-	Arabidopsis thaliana
Solyc01g095320	G-Box	CACGTG	510	6	+	Pisum sativum	cis-acting regulatory element involved in light responsiveness
Solyc01g095320	MYB	TAACCA	595	6	+	Arabidopsis thaliana
Solyc01g095320	MYB	CAACCA	1398	6	-	Arabidopsis thaliana
Solyc01g095320	I-box	gGATAAGGTG	1243	9	+	Zea mays	part of a light responsive element
Solyc01g095320	Unnamed__4	CTCC	576	4	+	Petroselinum hortense
Solyc01g095320	Unnamed__4	CTCC	767	4	-	Petroselinum hortense
Solyc01g095320	Unnamed__4	CTCC	821	4	-	Petroselinum hortense
Solyc01g095320	Unnamed__4	CTCC	1343	4	-	Petroselinum hortense
Solyc01g095320	ABRE	GACACGTGGC	508	9	+	Triticum aestivum	cis-acting element involved in the abscisic acid responsiveness
Solyc01g095320	ABRE	CACGTG	510	6	+	Arabidopsis thaliana	cis-acting element involved in the abscisic acid responsiveness
Solyc01g095320	ABRE	ACGTG	511	5	+	Arabidopsis thaliana	cis-acting element involved in the abscisic acid responsiveness
Solyc01g095320	CTAG-motif	ACTAGCAGAA	318	9	-	Avena sativa
Solyc03g026220	MYC	CAATTG	284	6	+	Arabidopsis thaliana
Solyc03g026220	MYC	CATGTG	523	6	-	Arabidopsis thaliana
Solyc03g026220	Box 4	ATTAAT	144	6	+	Petroselinum crispum	part of a conserved DNA module involved in light responsiveness
Solyc03g026220	Box 4	ATTAAT	171	6	+	Petroselinum crispum	part of a conserved DNA module involved in light responsiveness
Solyc03g026220	Box 4	ATTAAT	175	6	+	Petroselinum crispum	part of a conserved DNA module involved in light responsiveness
Solyc03g026220	Box 4	ATTAAT	189	6	+	Petroselinum crispum	part of a conserved DNA module involved in light responsiveness
Solyc03g026220	Box 4	ATTAAT	702	6	+	Petroselinum crispum	part of a conserved DNA module involved in light responsiveness
Solyc03g026220	Box 4	ATTAAT	706	6	+	Petroselinum crispum	part of a conserved DNA module involved in light responsiveness
Solyc03g026220	Box 4	ATTAAT	721	6	+	Petroselinum crispum	part of a conserved DNA module involved in light responsiveness
Solyc03g026220	MYB	CAACCA	565	6	-	Arabidopsis thaliana
Solyc03g026220	MYB	CAACCA	1478	6	+	Arabidopsis thaliana
Solyc03g026220	AT~TATA-box	TATATA	234	6	+	Arabidopsis thaliana
Solyc03g026220	AT~TATA-box	TATATA	891	6	-	Arabidopsis thaliana
Solyc03g026220	AT~TATA-box	TATATA	1139	6	-	Arabidopsis thaliana
Solyc03g026220	AT~TATA-box	TATATA	1253	6	-	Arabidopsis thaliana
Solyc03g026220	ERE	ATTTTAAA	456	8	+	Nicotiana glutinos
Solyc03g026220	ERE	ATTTTAAA	624	8	+	Nicotiana glutinos
Solyc03g026220	W box	TTGACC	591	6	-	Arabidopsis thaliana
Solyc03g026220	as-1	TGACG	909	5	+	Arabidopsis thaliana
Solyc03g026220	Unnamed__4	CTCC	312	4	-	Petroselinum hortense
Solyc03g026220	Unnamed__4	CTCC	1383	4	+	Petroselinum hortense
Solyc03g026220	Unnamed__4	CTCC	1441	4	+	Petroselinum hortense
Solyc03g026220	STRE	AGGGG	222	5	+	Arabidopsis thaliana
Solyc03g026220	TCA-element	CCATCTTTTT	1365	9	+	Nicotiana tabacum	cis-acting element involved in salicylic acid responsiveness
Solyc03g026220	GT1-motif	GGTTAA	242	6	+	Arabidopsis thaliana	light responsive element
Solyc03g026220	TCA	TCATCTTCAT	785	9	-	Pisum sativum
Solyc03g026220	TATA	TATAAAAT	1054	8	-	Arabidopsis thaliana
Solyc03g026220	CAG-motif	GAAAGGCAGAC	1118	10	-	Arabidopsis thaliana	part of a light response element
Solyc03g026220	CAAT-box	CAAT	137	4	+	Nicotiana glutinosa
Solyc03g026220	CAAT-box	CAAT	156	4	+	Nicotiana glutinosa
Solyc03g026220	CAAT-box	CAAT	185	4	-	Nicotiana glutinosa
Solyc03g026220	CAAT-box	CAAT	284	4	+	Nicotiana glutinosa
Solyc03g026220	CAAT-box	CCAAT	286	5	-	Arabidopsis thaliana	common cis-acting element in promoter and enhancer regions
Solyc03g026220	CAAT-box	CCAAT	472	5	-	Arabidopsis thaliana	common cis-acting element in promoter and enhancer regions
Solyc03g026220	CAAT-box	CAAT	483	4	-	Nicotiana glutinosa
Solyc03g026220	CAAT-box	CAAT	487	4	-	Nicotiana glutinosa
Solyc03g026220	CAAT-box	CAAAT	500	5	-	Pisum sativum	common cis-acting element in promoter and enhancer regions
Solyc03g026220	CAAT-box	CAAT	534	4	-	Nicotiana glutinosa
Solyc03g026220	CAAT-box	CAAAT	594	5	+	Pisum sativum	common cis-acting element in promoter and enhancer regions
Solyc03g026220	CAAT-box	CAAT	754	4	-	Nicotiana glutinosa
Solyc03g026220	CAAT-box	CAAT	783	4	+	Nicotiana glutinosa
Solyc03g026220	CAAT-box	CAAT	861	4	+	Nicotiana glutinosa
Solyc03g026220	CAAT-box	CAAT	985	4	+	Nicotiana glutinosa
Solyc03g026220	CAAT-box	CAAT	1049	4	-	Nicotiana glutinosa
Solyc03g026220	CAAT-box	CAAT	1080	4	+	Nicotiana glutinosa
Solyc03g026220	CAAT-box	CAAAT	1144	5	-	Pisum sativum	common cis-acting element in promoter and enhancer regions
Solyc03g026220	CAAT-box	CCAAT	1191	5	+	Arabidopsis thaliana	common cis-acting element in promoter and enhancer regions
Solyc03g026220	CAAT-box	CAAT	1192	4	+	Nicotiana glutinosa
Solyc03g026220	CAAT-box	CAAT	1219	4	+	Nicotiana glutinosa
Solyc03g026220	CAAT-box	CAAAT	1297	5	-	Pisum sativum	common cis-acting element in promoter and enhancer regions
Solyc03g026220	CAAT-box	CCAAT	1481	5	+	Arabidopsis thaliana	common cis-acting element in promoter and enhancer regions
Solyc03g026220	CAAT-box	CAAT	1482	4	+	Nicotiana glutinosa
Solyc03g026220	CGTCA-motif	CGTCA	909	5	-	Hordeum vulgare	cis-acting regulatory element involved in the MeJA-responsiveness
Solyc03g026220	MBS	CAACTG	959	6	+	Arabidopsis thaliana	MYB binding site involved in drought-inducibility
Solyc03g026220		motif_sequence	298	4	-	organism	short_function
Solyc03g026220		motif_sequence	551	4	+	organism	short_function
Solyc03g026220		motif_sequence	1265	4	+	organism	short_function
Solyc03g026220		motif_sequence	1272	4	-	organism	short_function
Solyc03g026220		motif_sequence	1302	4	+	organism	short_function
Solyc03g026220		motif_sequence	1358	4	+	organism	short_function
Solyc03g026220		motif_sequence	1367	4	+	organism	short_function
Solyc03g026220	AAGAA-motif	GAAAGAA	92	7	-	Avena sativa
Solyc03g026220	TATA-box	ATTATA	5	6	+	Brassica napus	core promoter element around -30 of transcription start
Solyc03g026220	TATA-box	TATAA	6	5	-	Arabidopsis thaliana	core promoter element around -30 of transcription start
Solyc03g026220	TATA-box	TATA	7	4	+	Arabidopsis thaliana	core promoter element around -30 of transcription start
Solyc03g026220	TATA-box	TATACA	25	6	-	Helianthus annuus	core promoter element around -30 of transcription start
Solyc03g026220	TATA-box	TATA	27	4	+	Arabidopsis thaliana	core promoter element around -30 of transcription start
Solyc03g026220	TATA-box	ATATAA	139	6	+	Brassica oleracea	core promoter element around -30 of transcription start
Solyc03g026220	TATA-box	TATA	140	4	+	Arabidopsis thaliana	core promoter element around -30 of transcription start
Solyc03g026220	TATA-box	TATAAAT	179	7	-	Brassica juncea	core promoter element around -30 of transcription start
Solyc03g026220	TATA-box	TATAAA	180	6	-	Helianthus annuus	core promoter element around -30 of transcription start
Solyc03g026220	TATA-box	TATAA	181	5	-	Arabidopsis thaliana	core promoter element around -30 of transcription start
Solyc03g026220	TATA-box	TATA	182	4	+	Arabidopsis thaliana	core promoter element around -30 of transcription start
Solyc03g026220	TATA-box	ATTATA	193	6	+	Brassica napus	core promoter element around -30 of transcription start
Solyc03g026220	TATA-box	TATAA	194	5	-	Arabidopsis thaliana	core promoter element around -30 of transcription start
Solyc03g026220	TATA-box	TATA	195	4	+	Arabidopsis thaliana	core promoter element around -30 of transcription start
Solyc03g026220	TATA-box	ccTATAAAaa	215	9	-	Arabidopsis thaliana	core promoter element around -30 of transcription start
Solyc03g026220	TATA-box	ATATAT	233	6	+	Brassica napus	core promoter element around -30 of transcription start
Solyc03g026220	TATA-box	TATATA	234	6	+	Arabidopsis thaliana	core promoter element around -30 of transcription start
Solyc03g026220	TATA-box	ATATAA	235	6	+	Brassica oleracea	core promoter element around -30 of transcription start
Solyc03g026220	TATA-box	TATA	236	4	+	Arabidopsis thaliana	core promoter element around -30 of transcription start
Solyc03g026220	TATA-box	ATTATA	347	6	+	Brassica napus	core promoter element around -30 of transcription start
Solyc03g026220	TATA-box	TATAA	348	5	-	Arabidopsis thaliana	core promoter element around -30 of transcription start
Solyc03g026220	TATA-box	TATA	349	4	+	Arabidopsis thaliana	core promoter element around -30 of transcription start
Solyc03g026220	TATA-box	TATAA	441	5	-	Arabidopsis thaliana	core promoter element around -30 of transcription start
Solyc03g026220	TATA-box	TATA	442	4	+	Arabidopsis thaliana	core promoter element around -30 of transcription start
Solyc03g026220	TATA-box	TATA	494	4	+	Arabidopsis thaliana	core promoter element around -30 of transcription start
Solyc03g026220	TATA-box	ATTATA	545	6	+	Brassica napus	core promoter element around -30 of transcription start
Solyc03g026220	TATA-box	TATAA	546	5	-	Arabidopsis thaliana	core promoter element around -30 of transcription start
Solyc03g026220	TATA-box	TATA	547	4	+	Arabidopsis thaliana	core promoter element around -30 of transcription start
Solyc03g026220	TATA-box	TATTTAAA	608	8	-	Arabidopsis thaliana	core promoter element around -30 of transcription start
Solyc03g026220	TATA-box	TACAAAA	677	7	-	Oryza sativa	core promoter element around -30 of transcription start
Solyc03g026220	TATA-box	TATTTAAA	758	8	-	Arabidopsis thaliana	core promoter element around -30 of transcription start
Solyc03g026220	TATA-box	ATATAT	890	6	-	Brassica napus	core promoter element around -30 of transcription start
Solyc03g026220	TATA-box	TATATA	891	6	-	Arabidopsis thaliana	core promoter element around -30 of transcription start
Solyc03g026220	TATA-box	ATATAA	892	6	+	Brassica oleracea	core promoter element around -30 of transcription start
Solyc03g026220	TATA-box	TATA	893	4	-	Arabidopsis thaliana	core promoter element around -30 of transcription start
Solyc03g026220	TATA-box	TATAAAA	1055	7	-	Pisum sativum	core promoter element around -30 of transcription start
Solyc03g026220	TATA-box	TATAAA	1056	6	-	Helianthus annuus	core promoter element around -30 of transcription start
Solyc03g026220	TATA-box	TATAA	1057	5	-	Arabidopsis thaliana	core promoter element around -30 of transcription start
Solyc03g026220	TATA-box	TATA	1058	4	-	Arabidopsis thaliana	core promoter element around -30 of transcription start
Solyc03g026220	TATA-box	TATAAGAA	1135	8	-	Zea mays	core promoter element around -30 of transcription start
Solyc03g026220	TATA-box	TATATAA	1138	7	-	Arabidopsis thaliana	core promoter element around -30 of transcription start
Solyc03g026220	TATA-box	TATATA	1139	6	-	Arabidopsis thaliana	core promoter element around -30 of transcription start
Solyc03g026220	TATA-box	ATATAT	1140	6	-	Brassica napus	core promoter element around -30 of transcription start
Solyc03g026220	TATA-box	TATA	1141	4	-	Arabidopsis thaliana	core promoter element around -30 of transcription start
Solyc03g026220	TATA-box	TATATTTATATTT	1165	12	-	Avena sativa	core promoter element around -30 of transcription start
Solyc03g026220	TATA-box	TATA	1168	4	-	Arabidopsis thaliana	core promoter element around -30 of transcription start
Solyc03g026220	TATA-box	ATATAA	1173	6	+	Brassica oleracea	core promoter element around -30 of transcription start
Solyc03g026220	TATA-box	TATA	1174	4	-	Arabidopsis thaliana	core promoter element around -30 of transcription start
Solyc03g026220	TATA-box	TATAAAA	1227	7	-	Pisum sativum	core promoter element around -30 of transcription start
Solyc03g026220	TATA-box	TATAAA	1228	6	-	Helianthus annuus	core promoter element around -30 of transcription start
Solyc03g026220	TATA-box	TATAA	1229	5	-	Arabidopsis thaliana	core promoter element around -30 of transcription start
Solyc03g026220	TATA-box	TATA	1230	4	-	Arabidopsis thaliana	core promoter element around -30 of transcription start
Solyc03g026220	TATA-box	ATTATA	1251	6	+	Brassica napus	core promoter element around -30 of transcription start
Solyc03g026220	TATA-box	TATATAA	1252	7	-	Arabidopsis thaliana	core promoter element around -30 of transcription start
Solyc03g026220	TATA-box	TATATA	1253	6	-	Arabidopsis thaliana	core promoter element around -30 of transcription start
Solyc03g026220	TATA-box	ATATAA	1254	6	+	Brassica oleracea	core promoter element around -30 of transcription start
Solyc03g026220	TATA-box	TATA	1255	4	-	Arabidopsis thaliana	core promoter element around -30 of transcription start
Solyc03g026220	TATA-box	TATAAATA	1315	8	-	Daucus carota	core promoter element around -30 of transcription start
Solyc03g026220	TATA-box	TATAAAT	1316	7	-	Brassica juncea	core promoter element around -30 of transcription start
Solyc03g026220	TATA-box	TATAAA	1317	6	-	Helianthus annuus	core promoter element around -30 of transcription start
Solyc03g026220	TATA-box	TATAA	1318	5	-	Arabidopsis thaliana	core promoter element around -30 of transcription start
Solyc03g026220	TATA-box	TATA	1319	4	-	Arabidopsis thaliana	core promoter element around -30 of transcription start
Solyc03g026220	TATA-box	TACAAAA	1326	7	-	Oryza sativa	core promoter element around -30 of transcription start
Solyc03g026220	TATA-box	TACAAAA	1410	7	+	Oryza sativa	core promoter element around -30 of transcription start
Solyc03g026220	Myb	TAACTG	81	6	-	Arabidopsis thaliana
Solyc03g026220	Myb	TAACTG	357	6	+	Arabidopsis thaliana
Solyc03g026220	Myb	TAACTG	816	6	-	Arabidopsis thaliana
Solyc03g026220	Myb	CAACTG	959	6	+	Arabidopsis thaliana
Solyc03g026220	TGACG-motif	TGACG	909	5	+	Hordeum vulgare	cis-acting regulatory element involved in the MeJA-responsiveness
Solyc03g083970	G-Box	CACGTT	636	6	-	Pisum sativum	cis-acting regulatory element involved in light responsiveness
Solyc03g083970	G-Box	CACGTG	859	6	-	Pisum sativum	cis-acting regulatory element involved in light responsiveness
Solyc03g083970	G-Box	TCCACATGGCA	891	10	+	Triticum aestivum	cis-acting regulatory element involved in light responsiveness
Solyc03g083970	AT~TATA-box	TATATA	338	6	+	Arabidopsis thaliana
Solyc03g083970	ERE	ATTTTAAA	308	8	-	Nicotiana glutinos
Solyc03g083970	ERE	ATTTTAAA	1008	8	+	Nicotiana glutinos
Solyc03g083970	ERE	ATTTTAAA	1057	8	+	Nicotiana glutinos
Solyc03g083970	ERE	ATTTTAAA	1059	8	-	Nicotiana glutinos
Solyc03g083970	MYB	TAACCA	1471	6	+	Arabidopsis thaliana
Solyc03g083970	DRE core	GCCGAC	760	6	+	Arabidopsis thaliana
Solyc03g083970	TGA-element	AACGAC	587	6	+	Brassica oleracea	auxin-responsive element
Solyc03g083970	TGA-element	AACGAC	664	6	+	Brassica oleracea	auxin-responsive element
Solyc03g083970	ABRE	ACGTG	637	5	+	Arabidopsis thaliana	cis-acting element involved in the abscisic acid responsiveness
Solyc03g083970	ABRE	CACGTG	859	6	-	Arabidopsis thaliana	cis-acting element involved in the abscisic acid responsiveness
Solyc03g083970	ABRE	ACGTG	860	5	+	Arabidopsis thaliana	cis-acting element involved in the abscisic acid responsiveness
Solyc03g083970	Unnamed__4	CTCC	624	4	-	Petroselinum hortense
Solyc03g083970	Unnamed__4	CTCC	632	4	+	Petroselinum hortense
Solyc03g083970	Unnamed__4	CTCC	742	4	-	Petroselinum hortense
Solyc03g083970	Unnamed__4	CTCC	815	4	+	Petroselinum hortense
Solyc03g083970	Unnamed__4	CTCC	933	4	+	Petroselinum hortense
Solyc03g083970	Unnamed__4	CTCC	1292	4	+	Petroselinum hortense
Solyc03g083970	W box	TTGACC	775	6	+	Arabidopsis thaliana
Solyc03g083970	MYC	CATTTG	183	6	-	Arabidopsis thaliana
Solyc03g083970	MYC	CATGTG	893	6	-	Arabidopsis thaliana
Solyc03g083970	MYC	CAATTG	1261	6	-	Arabidopsis thaliana
Solyc03g083970	MYC	CATGTG	1358	6	-	Arabidopsis thaliana
Solyc03g083970	MYB-like sequence	TAACCA	1471	6	+	Arabidopsis thaliana
Solyc03g083970	ATCT-motif	AATCTAATCC	612	9	-	Pisum sativum	part of a conserved DNA module involved in light responsiveness
Solyc03g083970	P-box	CCTTTTG	286	7	-	Oryza sativa	gibberellin-responsive element
Solyc03g083970	A-box	CCGTCC	1124	6	-	Petroselinum crispum	cis-acting regulatory element
Solyc03g083970	Box 4	ATTAAT	83	6	+	Petroselinum crispum	part of a conserved DNA module involved in light responsiveness
Solyc03g083970	Box 4	ATTAAT	658	6	+	Petroselinum crispum	part of a conserved DNA module involved in light responsiveness
Solyc03g083970	Box 4	ATTAAT	728	6	+	Petroselinum crispum	part of a conserved DNA module involved in light responsiveness
Solyc03g083970	Box 4	ATTAAT	960	6	-	Petroselinum crispum	part of a conserved DNA module involved in light responsiveness
Solyc03g083970	Box 4	ATTAAT	969	6	-	Petroselinum crispum	part of a conserved DNA module involved in light responsiveness
Solyc03g083970	Box 4	ATTAAT	997	6	-	Petroselinum crispum	part of a conserved DNA module involved in light responsiveness
Solyc03g083970	AAGAA-motif	GAAAGAA	1377	7	-	Avena sativa
Solyc03g083970	TATC-box	TATCCCA	194	7	-	Oryza sativa	cis-acting element involved in gibberellin-responsiveness
Solyc03g083970	TATC-box	TATCCCA	1248	7	+	Oryza sativa	cis-acting element involved in gibberellin-responsiveness
Solyc03g083970		motif_sequence	18	4	-	organism	short_function
Solyc03g083970		motif_sequence	157	4	-	organism	short_function
Solyc03g083970		motif_sequence	624	4	-	organism	short_function
Solyc03g083970		motif_sequence	813	4	+	organism	short_function
Solyc03g083970		motif_sequence	1029	4	+	organism	short_function
Solyc03g083970		motif_sequence	1178	4	-	organism	short_function
Solyc03g083970		motif_sequence	1312	4	+	organism	short_function
Solyc03g083970		motif_sequence	1338	4	-	organism	short_function
Solyc03g083970		motif_sequence	1374	4	+	organism	short_function
Solyc03g083970		motif_sequence	1391	4	-	organism	short_function
Solyc03g083970		motif_sequence	1456	4	+	organism	short_function
Solyc03g083970		motif_sequence	1490	4	+	organism	short_function
Solyc03g083970	MBS	CAACTG	1295	6	-	Arabidopsis thaliana	MYB binding site involved in drought-inducibility
Solyc03g083970	MBS	CAACTG	1333	6	+	Arabidopsis thaliana	MYB binding site involved in drought-inducibility
Solyc03g083970	CCGTCC-box	CCGTCC	1124	6	-	Petroselinum hortense
Solyc03g083970	Myb	TAACTG	72	6	+	Arabidopsis thaliana
Solyc03g083970	Myb	CAACTG	1295	6	-	Arabidopsis thaliana
Solyc03g083970	Myb	CAACTG	1333	6	+	Arabidopsis thaliana
Solyc03g083970	G-box	CACGTG	859	6	-	Arabidopsis thaliana	cis-acting regulatory element involved in light responsiveness
Solyc03g083970	TATA-box	TATA	1	4	+	Arabidopsis thaliana	core promoter element around -30 of transcription start
Solyc03g083970	TATA-box	ATATAA	59	6	+	Brassica oleracea	core promoter element around -30 of transcription start
Solyc03g083970	TATA-box	TATA	60	4	+	Arabidopsis thaliana	core promoter element around -30 of transcription start
Solyc03g083970	TATA-box	ATATAA	64	6	+	Brassica oleracea	core promoter element around -30 of transcription start
Solyc03g083970	TATA-box	TATA	65	4	+	Arabidopsis thaliana	core promoter element around -30 of transcription start
Solyc03g083970	TATA-box	ATATAA	69	6	+	Brassica oleracea	core promoter element around -30 of transcription start
Solyc03g083970	TATA-box	TATA	70	4	+	Arabidopsis thaliana	core promoter element around -30 of transcription start
Solyc03g083970	TATA-box	ccTATAAAaa	94	9	+	Arabidopsis thaliana	core promoter element around -30 of transcription start
Solyc03g083970	TATA-box	TATACA	187	6	-	Helianthus annuus	core promoter element around -30 of transcription start
Solyc03g083970	TATA-box	TATA	189	4	+	Arabidopsis thaliana	core promoter element around -30 of transcription start
Solyc03g083970	TATA-box	ATATAA	262	6	+	Brassica oleracea	core promoter element around -30 of transcription start
Solyc03g083970	TATA-box	TATA	263	4	+	Arabidopsis thaliana	core promoter element around -30 of transcription start
Solyc03g083970	TATA-box	ATTATA	336	6	+	Brassica napus	core promoter element around -30 of transcription start
Solyc03g083970	TATA-box	TATATAA	337	7	-	Arabidopsis thaliana	core promoter element around -30 of transcription start
Solyc03g083970	TATA-box	TATATA	338	6	+	Arabidopsis thaliana	core promoter element around -30 of transcription start
Solyc03g083970	TATA-box	ATATAA	339	6	+	Brassica oleracea	core promoter element around -30 of transcription start
Solyc03g083970	TATA-box	TATA	340	4	+	Arabidopsis thaliana	core promoter element around -30 of transcription start
Solyc03g083970	TATA-box	TATTTAAA	348	8	+	Arabidopsis thaliana	core promoter element around -30 of transcription start
Solyc03g083970	TATA-box	TATAA	364	5	-	Arabidopsis thaliana	core promoter element around -30 of transcription start
Solyc03g083970	TATA-box	TATA	365	4	+	Arabidopsis thaliana	core promoter element around -30 of transcription start
Solyc03g083970	TATA-box	ATATAT	392	6	+	Brassica napus	core promoter element around -30 of transcription start
Solyc03g083970	TATA-box	TATA	393	4	+	Arabidopsis thaliana	core promoter element around -30 of transcription start
Solyc03g083970	TATA-box	TATTTAAA	395	8	+	Arabidopsis thaliana	core promoter element around -30 of transcription start
Solyc03g083970	TATA-box	TATTTAAA	424	8	+	Arabidopsis thaliana	core promoter element around -30 of transcription start
Solyc03g083970	TATA-box	TATA	502	4	+	Arabidopsis thaliana	core promoter element around -30 of transcription start
Solyc03g083970	TATA-box	taTATAAAtc	576	9	-	Arabidopsis thaliana	core promoter element around -30 of transcription start
Solyc03g083970	TATA-box	TATAAAT	577	7	-	Brassica juncea	core promoter element around -30 of transcription start
Solyc03g083970	TATA-box	TATAAA	578	6	-	Helianthus annuus	core promoter element around -30 of transcription start
Solyc03g083970	TATA-box	TATAA	579	5	-	Arabidopsis thaliana	core promoter element around -30 of transcription start
Solyc03g083970	TATA-box	TATA	580	4	+	Arabidopsis thaliana	core promoter element around -30 of transcription start
Solyc03g083970	TATA-box	TATA	620	4	+	Arabidopsis thaliana	core promoter element around -30 of transcription start
Solyc03g083970	TATA-box	ATTATA	672	6	+	Brassica napus	core promoter element around -30 of transcription start
Solyc03g083970	TATA-box	TATAA	673	5	-	Arabidopsis thaliana	core promoter element around -30 of transcription start
Solyc03g083970	TATA-box	TATA	674	4	+	Arabidopsis thaliana	core promoter element around -30 of transcription start
Solyc03g083970	TATA-box	TATAAAA	717	7	-	Pisum sativum	core promoter element around -30 of transcription start
Solyc03g083970	TATA-box	TATAAA	718	6	-	Helianthus annuus	core promoter element around -30 of transcription start
Solyc03g083970	TATA-box	TATAA	719	5	-	Arabidopsis thaliana	core promoter element around -30 of transcription start
Solyc03g083970	TATA-box	TATA	720	4	+	Arabidopsis thaliana	core promoter element around -30 of transcription start
Solyc03g083970	TATA-box	TATAA	853	5	-	Arabidopsis thaliana	core promoter element around -30 of transcription start
Solyc03g083970	TATA-box	TATA	854	4	-	Arabidopsis thaliana	core promoter element around -30 of transcription start
Solyc03g083970	TATA-box	ccTATAAAaa	974	9	-	Arabidopsis thaliana	core promoter element around -30 of transcription start
Solyc03g083970	TATA-box	ATTATA	987	6	+	Brassica napus	core promoter element around -30 of transcription start
Solyc03g083970	TATA-box	TATAA	988	5	-	Arabidopsis thaliana	core promoter element around -30 of transcription start
Solyc03g083970	TATA-box	TATA	989	4	-	Arabidopsis thaliana	core promoter element around -30 of transcription start
Solyc03g083970	TATA-box	ATTATA	992	6	+	Brassica napus	core promoter element around -30 of transcription start
Solyc03g083970	TATA-box	TATAA	993	5	-	Arabidopsis thaliana	core promoter element around -30 of transcription start
Solyc03g083970	TATA-box	TATA	994	4	-	Arabidopsis thaliana	core promoter element around -30 of transcription start
Solyc03g083970	TATA-box	TATTTAAA	1010	8	-	Arabidopsis thaliana	core promoter element around -30 of transcription start
Solyc03g083970	TATA-box	TATA	1035	4	-	Arabidopsis thaliana	core promoter element around -30 of transcription start
Solyc03g083970	TATA-box	ATTATA	1039	6	+	Brassica napus	core promoter element around -30 of transcription start
Solyc03g083970	TATA-box	TATAA	1040	5	-	Arabidopsis thaliana	core promoter element around -30 of transcription start
Solyc03g083970	TATA-box	TATA	1041	4	-	Arabidopsis thaliana	core promoter element around -30 of transcription start
Solyc03g083970	TATA-box	TATAAAA	1079	7	-	Pisum sativum	core promoter element around -30 of transcription start
Solyc03g083970	TATA-box	TATAAA	1080	6	-	Helianthus annuus	core promoter element around -30 of transcription start
Solyc03g083970	TATA-box	TATAA	1081	5	-	Arabidopsis thaliana	core promoter element around -30 of transcription start
Solyc03g083970	TATA-box	TATA	1082	4	-	Arabidopsis thaliana	core promoter element around -30 of transcription start
Solyc03g083970	TATA-box	ATATAA	1199	6	+	Brassica oleracea	core promoter element around -30 of transcription start
Solyc03g083970	TATA-box	TATA	1200	4	-	Arabidopsis thaliana	core promoter element around -30 of transcription start
Solyc03g083970	TATA-box	TACAAAA	1411	7	-	Oryza sativa	core promoter element around -30 of transcription start
Solyc03g083970	Unnamed__1	CGTGG	858	5	-	Zea mays
Solyc03g083970	Unnamed__1	GAATTTAATTAA	962	11	+	Glycine max	60K protein binding site
Solyc03g083970	GT1-motif	GGTTAA	1366	6	-	Arabidopsis thaliana	light responsive element
Solyc03g083970	GT1-motif	GGTTAA	1470	6	-	Arabidopsis thaliana	light responsive element
Solyc03g083970	AT-rich element	ATAGAAATCAA	1100	10	+	Glycine max	binding site of AT-rich DNA binding protein (ATBP-1)
Solyc03g083970	TCA-element	CCATCTTTTT	483	9	-	Nicotiana tabacum	cis-acting element involved in salicylic acid responsiveness
Solyc03g083970	O2-site	GATGACATGG	787	9	+	Zea mays	cis-acting regulatory element involved in zein metabolism regulation
Solyc03g083970	STRE	AGGGG	744	5	+	Arabidopsis thaliana
Solyc03g083970	CCGTCC motif	CCGTCC	1124	6	-	Nicotiana tabacum
Solyc03g083970	CAAT-box	CAAAT	128	5	-	Pisum sativum	common cis-acting element in promoter and enhancer regions
Solyc03g083970	CAAT-box	CAAAT	183	5	+	Pisum sativum	common cis-acting element in promoter and enhancer regions
Solyc03g083970	CAAT-box	CAAT	355	4	-	Nicotiana glutinosa
Solyc03g083970	CAAT-box	CAAT	515	4	+	Nicotiana glutinosa
Solyc03g083970	CAAT-box	CAAT	628	4	-	Nicotiana glutinosa
Solyc03g083970	CAAT-box	CAAAT	703	5	-	Pisum sativum	common cis-acting element in promoter and enhancer regions
Solyc03g083970	CAAT-box	CCAAT	732	5	-	Arabidopsis thaliana	common cis-acting element in promoter and enhancer regions
Solyc03g083970	CAAT-box	CCAAT	755	5	-	Arabidopsis thaliana	common cis-acting element in promoter and enhancer regions
Solyc03g083970	CAAT-box	CAAT	827	4	-	Nicotiana glutinosa
Solyc03g083970	CAAT-box	CAAT	874	4	-	Nicotiana glutinosa
Solyc03g083970	CAAT-box	CAAT	900	4	+	Nicotiana glutinosa
Solyc03g083970	CAAT-box	CAAT	922	4	+	Nicotiana glutinosa
Solyc03g083970	CAAT-box	CAAAT	1001	5	-	Pisum sativum	common cis-acting element in promoter and enhancer regions
Solyc03g083970	CAAT-box	CAAT	1168	4	-	Nicotiana glutinosa
Solyc03g083970	CAAT-box	CAAAT	1174	5	-	Pisum sativum	common cis-acting element in promoter and enhancer regions
Solyc03g083970	CAAT-box	CAAAT	1213	5	-	Pisum sativum	common cis-acting element in promoter and enhancer regions
Solyc03g083970	CAAT-box	CAAAT	1223	5	+	Pisum sativum	common cis-acting element in promoter and enhancer regions
Solyc03g083970	CAAT-box	CAAT	1231	4	-	Nicotiana glutinosa
Solyc03g083970	CAAT-box	CAAT	1236	4	-	Nicotiana glutinosa
Solyc03g083970	CAAT-box	CAAT	1261	4	+	Nicotiana glutinosa
Solyc03g083970	CAAT-box	CAAT	1263	4	-	Nicotiana glutinosa
Solyc03g083970	CAAT-box	CAAT	1320	4	+	Nicotiana glutinosa
Solyc03g083970	CAAT-box	CCAAT	1384	5	+	Arabidopsis thaliana	common cis-acting element in promoter and enhancer regions
Solyc03g083970	CAAT-box	CAAT	1385	4	+	Nicotiana glutinosa
Solyc03g083970	CAAT-box	CAAAT	1437	5	-	Pisum sativum	common cis-acting element in promoter and enhancer regions
Solyc03g083970	CAAT-box	CCAAT	1474	5	+	Arabidopsis thaliana	common cis-acting element in promoter and enhancer regions
Solyc03g083970	CAAT-box	CAAT	1475	4	+	Nicotiana glutinosa
Solyc03g083970	CAAT-box	CAAAT	1495	5	+	Pisum sativum	common cis-acting element in promoter and enhancer regions
Solyc03g083970	MRE	AACCTAA	1480	7	+	Petroselinum crispum	MYB binding site involved in light responsiveness
Solyc03g083970	TATA	TATAAAAT	716	8	-	Arabidopsis thaliana
Solyc03g083970	GC-motif	CGCCGCGCA	1459	9	-	Oryza sativa	?
Solyc03g083970	TCA	TCATCTTCAT	1372	9	+	Pisum sativum
Solyc04g014740		motif_sequence	31	4	+	organism	short_function
Solyc04g014740		motif_sequence	88	4	-	organism	short_function
Solyc04g014740		motif_sequence	109	4	+	organism	short_function
Solyc04g014740		motif_sequence	720	4	+	organism	short_function
Solyc04g014740		motif_sequence	827	4	-	organism	short_function
Solyc04g014740		motif_sequence	966	4	-	organism	short_function
Solyc04g014740		motif_sequence	1043	4	-	organism	short_function
Solyc04g014740		motif_sequence	1124	4	-	organism	short_function
Solyc04g014740		motif_sequence	1426	4	-	organism	short_function
Solyc04g014740		motif_sequence	1455	4	+	organism	short_function
Solyc04g014740	DRE1	ACCGAGA	70	7	-	Zea mays
Solyc04g014740	MBS	CAACTG	1376	6	-	Arabidopsis thaliana	MYB binding site involved in drought-inducibility
Solyc04g014740	TATA-box	TACAAAA	141	7	+	Oryza sativa	core promoter element around -30 of transcription start
Solyc04g014740	TATA-box	TATA	203	4	+	Arabidopsis thaliana	core promoter element around -30 of transcription start
Solyc04g014740	TATA-box	TATAAA	321	6	-	Helianthus annuus	core promoter element around -30 of transcription start
Solyc04g014740	TATA-box	TATAA	322	5	-	Arabidopsis thaliana	core promoter element around -30 of transcription start
Solyc04g014740	TATA-box	TATA	323	4	+	Arabidopsis thaliana	core promoter element around -30 of transcription start
Solyc04g014740	TATA-box	TATA	449	4	+	Arabidopsis thaliana	core promoter element around -30 of transcription start
Solyc04g014740	TATA-box	TATA	650	4	+	Arabidopsis thaliana	core promoter element around -30 of transcription start
Solyc04g014740	TATA-box	TATA	1011	4	-	Arabidopsis thaliana	core promoter element around -30 of transcription start
Solyc04g014740	TATA-box	ATATAA	1201	6	+	Brassica oleracea	core promoter element around -30 of transcription start
Solyc04g014740	TATA-box	TATA	1202	4	-	Arabidopsis thaliana	core promoter element around -30 of transcription start
Solyc04g014740	TATA-box	TATAAA	1218	6	-	Helianthus annuus	core promoter element around -30 of transcription start
Solyc04g014740	TATA-box	TATAA	1219	5	-	Arabidopsis thaliana	core promoter element around -30 of transcription start
Solyc04g014740	TATA-box	TATA	1220	4	-	Arabidopsis thaliana	core promoter element around -30 of transcription start
Solyc04g014740	TATA-box	TACAAAA	1222	7	+	Oryza sativa	core promoter element around -30 of transcription start
Solyc04g014740	TATA-box	TATAAGAA	1278	8	-	Zea mays	core promoter element around -30 of transcription start
Solyc04g014740	TATA-box	TATATAA	1281	7	-	Arabidopsis thaliana	core promoter element around -30 of transcription start
Solyc04g014740	TATA-box	TATATA	1282	6	-	Arabidopsis thaliana	core promoter element around -30 of transcription start
Solyc04g014740	TATA-box	ATATAA	1283	6	+	Brassica oleracea	core promoter element around -30 of transcription start
Solyc04g014740	TATA-box	TATA	1284	4	-	Arabidopsis thaliana	core promoter element around -30 of transcription start
Solyc04g014740	TATA-box	TATA	1372	4	-	Arabidopsis thaliana	core promoter element around -30 of transcription start
Solyc04g014740	Unnamed__1	CGTGG	913	5	+	Zea mays
Solyc04g014740	WRE3	CCACCT	941	6	-	Pisum sativum
Solyc04g014740	CCGTCC-box	CCGTCC	871	6	+	Petroselinum hortense
Solyc04g014740	Myb	CAACTG	1376	6	-	Arabidopsis thaliana
Solyc04g014740	WUN-motif	AAATTTCTT	153	9	+	Nicotiana glutinosa
Solyc04g014740	MRE	AACCTAA	704	7	+	Petroselinum crispum	MYB binding site involved in light responsiveness
Solyc04g014740	CCGTCC motif	CCGTCC	871	6	+	Nicotiana tabacum
Solyc04g014740	CAAT-box	CAAT	126	4	-	Nicotiana glutinosa
Solyc04g014740	CAAT-box	CAAT	169	4	-	Nicotiana glutinosa
Solyc04g014740	CAAT-box	CAAAT	181	5	+	Pisum sativum	common cis-acting element in promoter and enhancer regions
Solyc04g014740	CAAT-box	CAAT	216	4	-	Nicotiana glutinosa
Solyc04g014740	CAAT-box	CAAT	326	4	-	Nicotiana glutinosa
Solyc04g014740	CAAT-box	CAAAT	469	5	-	Pisum sativum	common cis-acting element in promoter and enhancer regions
Solyc04g014740	CAAT-box	CAAT	625	4	-	Nicotiana glutinosa
Solyc04g014740	CAAT-box	CCAAT	657	5	-	Arabidopsis thaliana	common cis-acting element in promoter and enhancer regions
Solyc04g014740	CAAT-box	CAAT	663	4	+	Nicotiana glutinosa
Solyc04g014740	CAAT-box	CCAAT	789	5	+	Arabidopsis thaliana	common cis-acting element in promoter and enhancer regions
Solyc04g014740	CAAT-box	CAAT	790	4	+	Nicotiana glutinosa
Solyc04g014740	CAAT-box	CAAT	963	4	-	Nicotiana glutinosa
Solyc04g014740	CAAT-box	CAAT	1036	4	+	Nicotiana glutinosa
Solyc04g014740	CAAT-box	CAAT	1070	4	-	Nicotiana glutinosa
Solyc04g014740	CAAT-box	CAAT	1142	4	+	Nicotiana glutinosa
Solyc04g014740	CAAT-box	CAAT	1174	4	-	Nicotiana glutinosa
Solyc04g014740	CAAT-box	CAAAT	1207	5	+	Pisum sativum	common cis-acting element in promoter and enhancer regions
Solyc04g014740	CAAT-box	CAAT	1210	4	-	Nicotiana glutinosa
Solyc04g014740	CAAT-box	CAAT	1309	4	-	Nicotiana glutinosa
Solyc04g014740	CAAT-box	CAAT	1323	4	-	Nicotiana glutinosa
Solyc04g014740	CAAT-box	CAAT	1445	4	+	Nicotiana glutinosa
Solyc04g014740	CAAT-box	CAAT	1460	4	+	Nicotiana glutinosa
Solyc04g014740	G-Box	CACGTT	911	6	-	Pisum sativum	cis-acting regulatory element involved in light responsiveness
Solyc04g014740	AT~TATA-box	TATATA	1282	6	-	Arabidopsis thaliana
Solyc04g014740	W box	TTGACC	1175	6	+	Arabidopsis thaliana
Solyc04g014740	ABRE	ACGTG	912	5	+	Arabidopsis thaliana	cis-acting element involved in the abscisic acid responsiveness
Solyc04g014740	Unnamed__4	CTCC	337	4	+	Petroselinum hortense
Solyc04g014740	Unnamed__4	CTCC	340	4	+	Petroselinum hortense
Solyc04g014740	Unnamed__4	CTCC	359	4	-	Petroselinum hortense
Solyc04g014740	Unnamed__4	CTCC	392	4	-	Petroselinum hortense
Solyc04g014740	Unnamed__4	CTCC	524	4	+	Petroselinum hortense
Solyc04g014740	Unnamed__4	CTCC	577	4	+	Petroselinum hortense
Solyc04g014740	Unnamed__4	CTCC	945	4	-	Petroselinum hortense
Solyc04g014740	Unnamed__4	CTCC	972	4	-	Petroselinum hortense
Solyc04g014740	Unnamed__4	CTCC	1250	4	+	Petroselinum hortense
Solyc04g014740	Unnamed__4	CTCC	1482	4	-	Petroselinum hortense
Solyc04g014740	TCT-motif	TCTTAC	752	6	-	Arabidopsis thaliana	part of a light responsive element
Solyc04g014740	P-box	CCTTTTG	240	7	+	Oryza sativa	gibberellin-responsive element
Solyc04g014740	AAAC-motif	CAATCAAAACCT	493	11	-	Spinacia oleracea	light responsive element
Solyc04g014740	MYC	CATTTG	181	6	-	Arabidopsis thaliana
Solyc04g014740	ARE	AAACCA	1380	6	-	Zea mays	cis-acting regulatory element essential for the anaerobic induction
Solyc04g014740	LTR	CCGAAA	1383	6	-	Hordeum vulgare	cis-acting element involved in low-temperature responsiveness
Solyc04g014740	A-box	CCGTCC	871	6	+	Petroselinum crispum	cis-acting regulatory element
Solyc06g007240	AAGAA-motif	gGTAAAGAAA	481	9	-	Avena sativa
Solyc06g007240	CGTCA-motif	CGTCA	205	5	-	Hordeum vulgare	cis-acting regulatory element involved in the MeJA-responsiveness
Solyc06g007240	CGTCA-motif	CGTCA	1238	5	+	Hordeum vulgare	cis-acting regulatory element involved in the MeJA-responsiveness
Solyc06g007240	MBS	CAACTG	1098	6	-	Arabidopsis thaliana	MYB binding site involved in drought-inducibility
Solyc06g007240		motif_sequence	96	4	+	organism	short_function
Solyc06g007240		motif_sequence	755	4	+	organism	short_function
Solyc06g007240		motif_sequence	1268	4	-	organism	short_function
Solyc06g007240	Myb	CAACTG	1098	6	-	Arabidopsis thaliana
Solyc06g007240	TGACG-motif	TGACG	205	5	+	Hordeum vulgare	cis-acting regulatory element involved in the MeJA-responsiveness
Solyc06g007240	TGACG-motif	TGACG	1238	5	-	Hordeum vulgare	cis-acting regulatory element involved in the MeJA-responsiveness
Solyc06g007240	circadian	CAAAGATATC	158	9	-	Lycopersicon esculentum	cis-acting regulatory element involved in circadian control
Solyc06g007240	TATA-box	TACAAAA	32	7	-	Oryza sativa	core promoter element around -30 of transcription start
Solyc06g007240	TATA-box	TATAAAA	104	7	-	Pisum sativum	core promoter element around -30 of transcription start
Solyc06g007240	TATA-box	TATAAA	105	6	-	Helianthus annuus	core promoter element around -30 of transcription start
Solyc06g007240	TATA-box	TATATAA	106	7	-	Arabidopsis thaliana	core promoter element around -30 of transcription start
Solyc06g007240	TATA-box	TATATA	107	6	+	Arabidopsis thaliana	core promoter element around -30 of transcription start
Solyc06g007240	TATA-box	ATATAT	108	6	+	Brassica napus	core promoter element around -30 of transcription start
Solyc06g007240	TATA-box	TATA	109	4	+	Arabidopsis thaliana	core promoter element around -30 of transcription start
Solyc06g007240	TATA-box	ATATAT	263	6	+	Brassica napus	core promoter element around -30 of transcription start
Solyc06g007240	TATA-box	TATATA	264	6	+	Arabidopsis thaliana	core promoter element around -30 of transcription start
Solyc06g007240	TATA-box	TATA	266	4	+	Arabidopsis thaliana	core promoter element around -30 of transcription start
Solyc06g007240	TATA-box	ATATAT	281	6	+	Brassica napus	core promoter element around -30 of transcription start
Solyc06g007240	TATA-box	TATATA	282	6	+	Arabidopsis thaliana	core promoter element around -30 of transcription start
Solyc06g007240	TATA-box	TATA	284	4	+	Arabidopsis thaliana	core promoter element around -30 of transcription start
Solyc06g007240	TATA-box	ATTATA	666	6	+	Brassica napus	core promoter element around -30 of transcription start
Solyc06g007240	TATA-box	TATAA	667	5	-	Arabidopsis thaliana	core promoter element around -30 of transcription start
Solyc06g007240	TATA-box	TATA	668	4	+	Arabidopsis thaliana	core promoter element around -30 of transcription start
Solyc06g007240	TATA-box	TATAAAT	871	7	-	Brassica juncea	core promoter element around -30 of transcription start
Solyc06g007240	TATA-box	TATAAA	872	6	-	Helianthus annuus	core promoter element around -30 of transcription start
Solyc06g007240	TATA-box	TATAA	873	5	-	Arabidopsis thaliana	core promoter element around -30 of transcription start
Solyc06g007240	TATA-box	TATA	874	4	-	Arabidopsis thaliana	core promoter element around -30 of transcription start
Solyc06g007240	TATA-box	ATATAA	911	6	+	Brassica oleracea	core promoter element around -30 of transcription start
Solyc06g007240	TATA-box	TATA	912	4	-	Arabidopsis thaliana	core promoter element around -30 of transcription start
Solyc06g007240	TATA-box	TATA	1015	4	-	Arabidopsis thaliana	core promoter element around -30 of transcription start
Solyc06g007240	TATA-box	TATACA	1133	6	-	Helianthus annuus	core promoter element around -30 of transcription start
Solyc06g007240	TATA-box	TATA	1135	4	-	Arabidopsis thaliana	core promoter element around -30 of transcription start
Solyc06g007240	TATA-box	ATATAT	1261	6	-	Brassica napus	core promoter element around -30 of transcription start
Solyc06g007240	TATA-box	TATA	1262	4	-	Arabidopsis thaliana	core promoter element around -30 of transcription start
Solyc06g007240	TATA-box	TATAA	1350	5	-	Arabidopsis thaliana	core promoter element around -30 of transcription start
Solyc06g007240	TATA-box	TATA	1351	4	-	Arabidopsis thaliana	core promoter element around -30 of transcription start
Solyc06g007240	TATA-box	TATA	1372	4	-	Arabidopsis thaliana	core promoter element around -30 of transcription start
Solyc06g007240	Unnamed__1	CGTGG	700	5	+	Zea mays
Solyc06g007240	TCA-element	CCATCTTTTT	980	9	-	Nicotiana tabacum	cis-acting element involved in salicylic acid responsiveness
Solyc06g007240	Unnamed__6	taTAAATATct	912	10	+	Zea mays
Solyc06g007240	STRE	AGGGG	366	5	-	Arabidopsis thaliana
Solyc06g007240	STRE	AGGGG	721	5	-	Arabidopsis thaliana
Solyc06g007240	STRE	AGGGG	783	5	-	Arabidopsis thaliana
Solyc06g007240	WUN-motif	AAATTTCTT	353	9	-	Nicotiana glutinosa
Solyc06g007240	WUN-motif	AAATTTCTT	510	9	-	Nicotiana glutinosa
Solyc06g007240	CAAT-box	CAAAT	65	5	-	Pisum sativum	common cis-acting element in promoter and enhancer regions
Solyc06g007240	CAAT-box	CAAAT	234	5	+	Pisum sativum	common cis-acting element in promoter and enhancer regions
Solyc06g007240	CAAT-box	CCAAT	237	5	-	Arabidopsis thaliana	common cis-acting element in promoter and enhancer regions
Solyc06g007240	CAAT-box	CAAT	395	4	+	Nicotiana glutinosa
Solyc06g007240	CAAT-box	CAAT	408	4	-	Nicotiana glutinosa
Solyc06g007240	CAAT-box	CAAT	467	4	+	Nicotiana glutinosa
Solyc06g007240	CAAT-box	CAAT	505	4	+	Nicotiana glutinosa
Solyc06g007240	CAAT-box	CAAT	529	4	-	Nicotiana glutinosa
Solyc06g007240	CAAT-box	CCAAT	624	5	+	Arabidopsis thaliana	common cis-acting element in promoter and enhancer regions
Solyc06g007240	CAAT-box	CAAT	625	4	+	Nicotiana glutinosa
Solyc06g007240	CAAT-box	CAAT	647	4	-	Nicotiana glutinosa
Solyc06g007240	CAAT-box	CAAAT	709	5	-	Pisum sativum	common cis-acting element in promoter and enhancer regions
Solyc06g007240	CAAT-box	CAAAT	764	5	-	Pisum sativum	common cis-acting element in promoter and enhancer regions
Solyc06g007240	CAAT-box	CAAT	793	4	-	Nicotiana glutinosa
Solyc06g007240	CAAT-box	CAAT	1043	4	+	Nicotiana glutinosa
Solyc06g007240	CAAT-box	CAAAT	1200	5	+	Pisum sativum	common cis-acting element in promoter and enhancer regions
Solyc06g007240	CAAT-box	CAAT	1241	4	+	Nicotiana glutinosa
Solyc06g007240	CAAT-box	CAAT	1265	4	-	Nicotiana glutinosa
Solyc06g007240	CAAT-box	CAAT	1296	4	-	Nicotiana glutinosa
Solyc06g007240	CAAT-box	CAAAT	1304	5	+	Pisum sativum	common cis-acting element in promoter and enhancer regions
Solyc06g007240	CAAT-box	CAAT	1336	4	-	Nicotiana glutinosa
Solyc06g007240	CAAT-box	CAAT	1341	4	-	Nicotiana glutinosa
Solyc06g007240	CAAT-box	CAAAT	1365	5	-	Pisum sativum	common cis-acting element in promoter and enhancer regions
Solyc06g007240	CAAT-box	CCAAT	1430	5	+	Arabidopsis thaliana	common cis-acting element in promoter and enhancer regions
Solyc06g007240	CAAT-box	CAAT	1431	4	+	Nicotiana glutinosa
Solyc06g007240	CAAT-box	CAAT	1496	4	+	Nicotiana glutinosa
Solyc06g007240	GA-motif	ATAGATAA	922	8	-	Arabidopsis thaliana	part of a light responsive element
Solyc06g007240	AE-box	AGAAACTT	956	8	-	Arabidopsis thaliana	part of a module for light response
Solyc06g007240	TATA	TATAAAAT	103	8	-	Arabidopsis thaliana
Solyc06g007240	AT~TATA-box	TATATAAA	105	8	-	Arabidopsis thaliana
Solyc06g007240	AT~TATA-box	TATATA	107	6	+	Arabidopsis thaliana
Solyc06g007240	AT~TATA-box	TATATA	264	6	+	Arabidopsis thaliana
Solyc06g007240	AT~TATA-box	TATATA	282	6	+	Arabidopsis thaliana
Solyc06g007240	ERE	ATTTTAAA	546	8	-	Nicotiana glutinos
Solyc06g007240	ERE	ATTTTAAA	599	8	-	Nicotiana glutinos
Solyc06g007240	ERE	ATTTTAAA	891	8	-	Nicotiana glutinos
Solyc06g007240	MYB	TAACCA	375	6	+	Arabidopsis thaliana
Solyc06g007240	F-box	CTATTCTCATT	1468	10	+	Lycopersicon esculentum
Solyc06g007240	GATA-motif	AAGATAAGATT	918	10	-	Arabidopsis thaliana	part of a light responsive element
Solyc06g007240	Unnamed__4	CTCC	369	4	+	Petroselinum hortense
Solyc06g007240	Unnamed__4	CTCC	654	4	+	Petroselinum hortense
Solyc06g007240	Unnamed__4	CTCC	786	4	+	Petroselinum hortense
Solyc06g007240	Unnamed__4	CTCC	1220	4	+	Petroselinum hortense
Solyc06g007240	Unnamed__4	CTCC	1356	4	-	Petroselinum hortense
Solyc06g007240	MBSI	aaaAaaC(G/C)GTTA	341	10.5	-	Petunia hybrida	MYB binding site involved in flavonoid biosynthetic genes regulation
Solyc06g007240	TGA-element	AACGAC	23	6	+	Brassica oleracea	auxin-responsive element
Solyc06g007240	LAMP-element	CTTTATCA	1092	8	+	Pisum sativum	part of a light responsive element
Solyc06g007240	W box	TTGACC	648	6	+	Arabidopsis thaliana
Solyc06g007240	as-1	TGACG	205	5	+	Arabidopsis thaliana
Solyc06g007240	as-1	TGACG	1238	5	-	Arabidopsis thaliana
Solyc06g007240	MYB-like sequence	TAACCA	375	6	+	Arabidopsis thaliana
Solyc06g007240	ATCT-motif	AATCTAATCC	1044	9	+	Pisum sativum	part of a conserved DNA module involved in light responsiveness
Solyc06g007240	ARE	AAACCA	520	6	+	Zea mays	cis-acting regulatory element essential for the anaerobic induction
Solyc06g007240	Box 4	ATTAAT	990	6	-	Petroselinum crispum	part of a conserved DNA module involved in light responsiveness
Solyc06g007240	Box 4	ATTAAT	994	6	-	Petroselinum crispum	part of a conserved DNA module involved in light responsiveness
Solyc06g007240	Box 4	ATTAAT	1292	6	-	Petroselinum crispum	part of a conserved DNA module involved in light responsiveness
Solyc06g035720	MYB-like sequence	TAACCA	1432	6	+	Arabidopsis thaliana
Solyc06g035720	MYC	CAATTG	136	6	+	Arabidopsis thaliana
Solyc06g035720	MYC	CATGTG	154	6	-	Arabidopsis thaliana
Solyc06g035720	MYC	CATGTG	1169	6	+	Arabidopsis thaliana
Solyc06g035720	MYC	CAATTG	1281	6	-	Arabidopsis thaliana
Solyc06g035720	MYC	CATTTG	1379	6	-	Arabidopsis thaliana
Solyc06g035720	Box 4	ATTAAT	43	6	+	Petroselinum crispum	part of a conserved DNA module involved in light responsiveness
Solyc06g035720	Box 4	ATTAAT	330	6	+	Petroselinum crispum	part of a conserved DNA module involved in light responsiveness
Solyc06g035720	Box 4	ATTAAT	464	6	+	Petroselinum crispum	part of a conserved DNA module involved in light responsiveness
Solyc06g035720	ARE	AAACCA	559	6	-	Zea mays	cis-acting regulatory element essential for the anaerobic induction
Solyc06g035720	ARE	AAACCA	564	6	-	Zea mays	cis-acting regulatory element essential for the anaerobic induction
Solyc06g035720	MYB	CAACAG	358	6	+	Arabidopsis thaliana
Solyc06g035720	MYB	TAACCA	1432	6	+	Arabidopsis thaliana
Solyc06g035720	ACE	GCGACGTACC	363	9	+	Petroselinum crispum	cis-acting element involved in light responsiveness
Solyc06g035720	ERE	ATTTCATA	112	8	-	Nicotiana glutinos
Solyc06g035720	ERE	ATTTTAAA	983	8	-	Nicotiana glutinos
Solyc06g035720	ERE	ATTTCATA	1194	8	-	Nicotiana glutinos
Solyc06g035720	AT~TATA-box	TATATA	315	6	+	Arabidopsis thaliana
Solyc06g035720	AT~TATA-box	TATATAAA	615	8	-	Arabidopsis thaliana
Solyc06g035720	AT~TATA-box	TATATA	617	6	+	Arabidopsis thaliana
Solyc06g035720	Unnamed__12	TCCACGTAGA	248	9	-	Zea mays
Solyc06g035720	TGA-element	AACGAC	432	6	-	Brassica oleracea	auxin-responsive element
Solyc06g035720	Unnamed__4	CTCC	255	4	-	Petroselinum hortense
Solyc06g035720	Unnamed__4	CTCC	265	4	-	Petroselinum hortense
Solyc06g035720	Unnamed__4	CTCC	272	4	-	Petroselinum hortense
Solyc06g035720	Unnamed__4	CTCC	1219	4	+	Petroselinum hortense
Solyc06g035720	Unnamed__8	TCCACGTAGA	248	9	-	Zea mays
Solyc06g035720	TATA	TATAAAAT	317	8	+	Arabidopsis thaliana
Solyc06g035720	TATA	TATAAAAT	323	8	-	Arabidopsis thaliana
Solyc06g035720	TATA	TATAAAAT	469	8	+	Arabidopsis thaliana
Solyc06g035720	TATA	TATAAAAT	475	8	-	Arabidopsis thaliana
Solyc06g035720	TATA	TATAAAAT	507	8	-	Arabidopsis thaliana
Solyc06g035720	TCA	TCATCTTCAT	1132	9	-	Pisum sativum
Solyc06g035720	TC-rich repeats	ATTCTCTAAC	598	9	+	Nicotiana tabacum	cis-acting element involved in defense and stress responsiveness
Solyc06g035720	CAAT-box	CAAT	19	4	-	Nicotiana glutinosa
Solyc06g035720	CAAT-box	CCAAT	62	5	+	Arabidopsis thaliana	common cis-acting element in promoter and enhancer regions
Solyc06g035720	CAAT-box	CAAT	63	4	+	Nicotiana glutinosa
Solyc06g035720	CAAT-box	CCAAT	96	5	+	Arabidopsis thaliana	common cis-acting element in promoter and enhancer regions
Solyc06g035720	CAAT-box	CAAT	97	4	+	Nicotiana glutinosa
Solyc06g035720	CAAT-box	CAAT	108	4	-	Nicotiana glutinosa
Solyc06g035720	CAAT-box	CAAT	136	4	+	Nicotiana glutinosa
Solyc06g035720	CAAT-box	CAAT	138	4	-	Nicotiana glutinosa
Solyc06g035720	CAAT-box	CAAAT	166	5	+	Pisum sativum	common cis-acting element in promoter and enhancer regions
Solyc06g035720	CAAT-box	CAAT	209	4	-	Nicotiana glutinosa
Solyc06g035720	CAAT-box	CAAAT	234	5	+	Pisum sativum	common cis-acting element in promoter and enhancer regions
Solyc06g035720	CAAT-box	CAAT	237	4	-	Nicotiana glutinosa
Solyc06g035720	CAAT-box	CAAT	348	4	-	Nicotiana glutinosa
Solyc06g035720	CAAT-box	CAAT	553	4	-	Nicotiana glutinosa
Solyc06g035720	CAAT-box	CAAT	607	4	+	Nicotiana glutinosa
Solyc06g035720	CAAT-box	CAAT	638	4	+	Nicotiana glutinosa
Solyc06g035720	CAAT-box	CAAT	683	4	-	Nicotiana glutinosa
Solyc06g035720	CAAT-box	CAAT	737	4	+	Nicotiana glutinosa
Solyc06g035720	CAAT-box	CCAAT	861	5	-	Arabidopsis thaliana	common cis-acting element in promoter and enhancer regions
Solyc06g035720	CAAT-box	CAAAT	897	5	-	Pisum sativum	common cis-acting element in promoter and enhancer regions
Solyc06g035720	CAAT-box	CAAAT	925	5	+	Pisum sativum	common cis-acting element in promoter and enhancer regions
Solyc06g035720	CAAT-box	CAAAT	954	5	-	Pisum sativum	common cis-acting element in promoter and enhancer regions
Solyc06g035720	CAAT-box	CAAAT	961	5	+	Pisum sativum	common cis-acting element in promoter and enhancer regions
Solyc06g035720	CAAT-box	CAAAT	972	5	-	Pisum sativum	common cis-acting element in promoter and enhancer regions
Solyc06g035720	CAAT-box	CAAT	989	4	-	Nicotiana glutinosa
Solyc06g035720	CAAT-box	CAAAT	1004	5	+	Pisum sativum	common cis-acting element in promoter and enhancer regions
Solyc06g035720	CAAT-box	CAAT	1032	4	+	Nicotiana glutinosa
Solyc06g035720	CAAT-box	CAAT	1070	4	+	Nicotiana glutinosa
Solyc06g035720	CAAT-box	CAAT	1128	4	-	Nicotiana glutinosa
Solyc06g035720	CAAT-box	CAAT	1146	4	+	Nicotiana glutinosa
Solyc06g035720	CAAT-box	CAAAT	1222	5	+	Pisum sativum	common cis-acting element in promoter and enhancer regions
Solyc06g035720	CAAT-box	CAAAT	1256	5	-	Pisum sativum	common cis-acting element in promoter and enhancer regions
Solyc06g035720	CAAT-box	CAAT	1263	4	-	Nicotiana glutinosa
Solyc06g035720	CAAT-box	CAAT	1281	4	+	Nicotiana glutinosa
Solyc06g035720	CAAT-box	CAAT	1283	4	-	Nicotiana glutinosa
Solyc06g035720	CAAT-box	CAAAT	1362	5	+	Pisum sativum	common cis-acting element in promoter and enhancer regions
Solyc06g035720	CAAT-box	CAAAT	1379	5	+	Pisum sativum	common cis-acting element in promoter and enhancer regions
Solyc06g035720	CAAT-box	CAAAT	1398	5	+	Pisum sativum	common cis-acting element in promoter and enhancer regions
Solyc06g035720	CAAT-box	CAAAT	1406	5	-	Pisum sativum	common cis-acting element in promoter and enhancer regions
Solyc06g035720	CAAT-box	CAAAT	1475	5	+	Pisum sativum	common cis-acting element in promoter and enhancer regions
Solyc06g035720		motif_sequence	57	4	+	organism	short_function
Solyc06g035720		motif_sequence	396	4	-	organism	short_function
Solyc06g035720		motif_sequence	708	4	+	organism	short_function
Solyc06g035720		motif_sequence	770	4	+	organism	short_function
Solyc06g035720	Unnamed__10	TCCACGTAGA	248	9	-	Zea mays
Solyc06g035720	Unnamed__14	TCCACGTAGA	248	9	-	Zea mays
Solyc06g035720	TATC-box	TATCCCA	999	7	+	Oryza sativa	cis-acting element involved in gibberellin-responsiveness
Solyc06g035720	TATA-box	TATA	148	4	+	Arabidopsis thaliana	core promoter element around -30 of transcription start
Solyc06g035720	TATA-box	TATACA	158	6	-	Helianthus annuus	core promoter element around -30 of transcription start
Solyc06g035720	TATA-box	TATA	160	4	+	Arabidopsis thaliana	core promoter element around -30 of transcription start
Solyc06g035720	TATA-box	TATA	173	4	+	Arabidopsis thaliana	core promoter element around -30 of transcription start
Solyc06g035720	TATA-box	TAAAGATT	182	8	-	Arabidopsis thaliana	core promoter element around -30 of transcription start
Solyc06g035720	TATA-box	ATATAA	193	6	+	Brassica oleracea	core promoter element around -30 of transcription start
Solyc06g035720	TATA-box	TATA	194	4	+	Arabidopsis thaliana	core promoter element around -30 of transcription start
Solyc06g035720	TATA-box	TACAAAA	285	7	+	Oryza sativa	core promoter element around -30 of transcription start
Solyc06g035720	TATA-box	TATATA	315	6	+	Arabidopsis thaliana	core promoter element around -30 of transcription start
Solyc06g035720	TATA-box	ATATAA	316	6	+	Brassica oleracea	core promoter element around -30 of transcription start
Solyc06g035720	TATA-box	TATA	317	4	+	Arabidopsis thaliana	core promoter element around -30 of transcription start
Solyc06g035720	TATA-box	TATAAAA	324	7	-	Pisum sativum	core promoter element around -30 of transcription start
Solyc06g035720	TATA-box	TATAAA	325	6	-	Helianthus annuus	core promoter element around -30 of transcription start
Solyc06g035720	TATA-box	TATAA	326	5	-	Arabidopsis thaliana	core promoter element around -30 of transcription start
Solyc06g035720	TATA-box	TATA	327	4	+	Arabidopsis thaliana	core promoter element around -30 of transcription start
Solyc06g035720	TATA-box	taTATAAAtc	463	9	-	Arabidopsis thaliana	core promoter element around -30 of transcription start
Solyc06g035720	TATA-box	ATATAA	468	6	+	Brassica oleracea	core promoter element around -30 of transcription start
Solyc06g035720	TATA-box	TATA	469	4	+	Arabidopsis thaliana	core promoter element around -30 of transcription start
Solyc06g035720	TATA-box	TATAAAA	476	7	-	Pisum sativum	core promoter element around -30 of transcription start
Solyc06g035720	TATA-box	TATAAA	477	6	-	Helianthus annuus	core promoter element around -30 of transcription start
Solyc06g035720	TATA-box	TATAA	478	5	-	Arabidopsis thaliana	core promoter element around -30 of transcription start
Solyc06g035720	TATA-box	TATA	479	4	+	Arabidopsis thaliana	core promoter element around -30 of transcription start
Solyc06g035720	TATA-box	TATAAAA	508	7	-	Pisum sativum	core promoter element around -30 of transcription start
Solyc06g035720	TATA-box	TATAAA	509	6	-	Helianthus annuus	core promoter element around -30 of transcription start
Solyc06g035720	TATA-box	TATAA	510	5	-	Arabidopsis thaliana	core promoter element around -30 of transcription start
Solyc06g035720	TATA-box	TATA	511	4	+	Arabidopsis thaliana	core promoter element around -30 of transcription start
Solyc06g035720	TATA-box	TATAAAA	614	7	-	Pisum sativum	core promoter element around -30 of transcription start
Solyc06g035720	TATA-box	TATAAA	615	6	-	Helianthus annuus	core promoter element around -30 of transcription start
Solyc06g035720	TATA-box	TATATAA	616	7	-	Arabidopsis thaliana	core promoter element around -30 of transcription start
Solyc06g035720	TATA-box	TATATA	617	6	+	Arabidopsis thaliana	core promoter element around -30 of transcription start
Solyc06g035720	TATA-box	TATA	619	4	+	Arabidopsis thaliana	core promoter element around -30 of transcription start
Solyc06g035720	TATA-box	ATTATA	727	6	+	Brassica napus	core promoter element around -30 of transcription start
Solyc06g035720	TATA-box	TATAA	728	5	-	Arabidopsis thaliana	core promoter element around -30 of transcription start
Solyc06g035720	TATA-box	TATA	729	4	+	Arabidopsis thaliana	core promoter element around -30 of transcription start
Solyc06g035720	TATA-box	TATTTAAA	838	8	-	Arabidopsis thaliana	core promoter element around -30 of transcription start
Solyc06g035720	TATA-box	TACAAAA	1019	7	+	Oryza sativa	core promoter element around -30 of transcription start
Solyc06g035720	TATA-box	ATATAA	1072	6	+	Brassica oleracea	core promoter element around -30 of transcription start
Solyc06g035720	TATA-box	TATA	1073	4	-	Arabidopsis thaliana	core promoter element around -30 of transcription start
Solyc06g035720	TATA-box	TATA	1238	4	-	Arabidopsis thaliana	core promoter element around -30 of transcription start
Solyc06g035720	TATA-box	TATAAAT	1300	7	-	Brassica juncea	core promoter element around -30 of transcription start
Solyc06g035720	TATA-box	TATAAA	1301	6	-	Helianthus annuus	core promoter element around -30 of transcription start
Solyc06g035720	TATA-box	TATAA	1302	5	-	Arabidopsis thaliana	core promoter element around -30 of transcription start
Solyc06g035720	TATA-box	TATA	1303	4	-	Arabidopsis thaliana	core promoter element around -30 of transcription start
Solyc06g035720	TATA-box	TATAA	1330	5	-	Arabidopsis thaliana	core promoter element around -30 of transcription start
Solyc06g035720	TATA-box	TATA	1331	4	-	Arabidopsis thaliana	core promoter element around -30 of transcription start
Solyc06g035720	TATA-box	ATATAT	1352	6	-	Brassica napus	core promoter element around -30 of transcription start
Solyc06g035720	TATA-box	TATA	1353	4	-	Arabidopsis thaliana	core promoter element around -30 of transcription start
Solyc06g035720	TATA-box	TATA	1430	4	-	Arabidopsis thaliana	core promoter element around -30 of transcription start
Solyc06g035720	TATA-box	TATA	1451	4	-	Arabidopsis thaliana	core promoter element around -30 of transcription start
Solyc06g035720	WRE3	CCACCT	251	6	-	Pisum sativum
Solyc06g035720	Myb-binding site	CAACAG	358	6	+	Nicotiana tabacum
Solyc06g072430	Box 4	ATTAAT	207	6	+	Petroselinum crispum	part of a conserved DNA module involved in light responsiveness
Solyc06g072430	Box 4	ATTAAT	253	6	+	Petroselinum crispum	part of a conserved DNA module involved in light responsiveness
Solyc06g072430	Box 4	ATTAAT	1251	6	-	Petroselinum crispum	part of a conserved DNA module involved in light responsiveness
Solyc06g072430	TATA	TATAAAAT	548	8	-	Arabidopsis thaliana
Solyc06g072430	CAAT-box	CAAT	13	4	-	Nicotiana glutinosa
Solyc06g072430	CAAT-box	CAAT	45	4	-	Nicotiana glutinosa
Solyc06g072430	CAAT-box	CAAAT	57	5	-	Pisum sativum	common cis-acting element in promoter and enhancer regions
Solyc06g072430	CAAT-box	CAAT	114	4	-	Nicotiana glutinosa
Solyc06g072430	CAAT-box	CAAAT	157	5	-	Pisum sativum	common cis-acting element in promoter and enhancer regions
Solyc06g072430	CAAT-box	CAAT	231	4	+	Nicotiana glutinosa
Solyc06g072430	CAAT-box	CAAAT	238	5	-	Pisum sativum	common cis-acting element in promoter and enhancer regions
Solyc06g072430	CAAT-box	CAAT	291	4	-	Nicotiana glutinosa
Solyc06g072430	CAAT-box	CAAT	333	4	-	Nicotiana glutinosa
Solyc06g072430	CAAT-box	CAAT	385	4	+	Nicotiana glutinosa
Solyc06g072430	CAAT-box	CAAT	435	4	-	Nicotiana glutinosa
Solyc06g072430	CAAT-box	CCAAT	439	5	-	Arabidopsis thaliana	common cis-acting element in promoter and enhancer regions
Solyc06g072430	CAAT-box	CAAT	444	4	-	Nicotiana glutinosa
Solyc06g072430	CAAT-box	CAAT	448	4	-	Nicotiana glutinosa
Solyc06g072430	CAAT-box	CAAT	485	4	+	Nicotiana glutinosa
Solyc06g072430	CAAT-box	CCAAT	601	5	+	Arabidopsis thaliana	common cis-acting element in promoter and enhancer regions
Solyc06g072430	CAAT-box	CAAT	602	4	+	Nicotiana glutinosa
Solyc06g072430	CAAT-box	CAAAT	607	5	+	Pisum sativum	common cis-acting element in promoter and enhancer regions
Solyc06g072430	CAAT-box	CAAAT	612	5	+	Pisum sativum	common cis-acting element in promoter and enhancer regions
Solyc06g072430	CAAT-box	CAAAT	624	5	-	Pisum sativum	common cis-acting element in promoter and enhancer regions
Solyc06g072430	CAAT-box	CAAAT	664	5	-	Pisum sativum	common cis-acting element in promoter and enhancer regions
Solyc06g072430	CAAT-box	CCAAT	673	5	-	Arabidopsis thaliana	common cis-acting element in promoter and enhancer regions
Solyc06g072430	CAAT-box	CAAT	684	4	+	Nicotiana glutinosa
Solyc06g072430	CAAT-box	CAAT	699	4	+	Nicotiana glutinosa
Solyc06g072430	CAAT-box	CAAT	709	4	+	Nicotiana glutinosa
Solyc06g072430	CAAT-box	CAAT	751	4	-	Nicotiana glutinosa
Solyc06g072430	CAAT-box	CAAT	806	4	+	Nicotiana glutinosa
Solyc06g072430	CAAT-box	CAAT	824	4	+	Nicotiana glutinosa
Solyc06g072430	CAAT-box	CAAAT	838	5	+	Pisum sativum	common cis-acting element in promoter and enhancer regions
Solyc06g072430	CAAT-box	CAAT	891	4	-	Nicotiana glutinosa
Solyc06g072430	CAAT-box	CAAT	903	4	+	Nicotiana glutinosa
Solyc06g072430	CAAT-box	CAAAT	992	5	+	Pisum sativum	common cis-acting element in promoter and enhancer regions
Solyc06g072430	CAAT-box	CAAT	1054	4	+	Nicotiana glutinosa
Solyc06g072430	CAAT-box	CAAAT	1059	5	+	Pisum sativum	common cis-acting element in promoter and enhancer regions
Solyc06g072430	CAAT-box	CAAT	1071	4	+	Nicotiana glutinosa
Solyc06g072430	CAAT-box	CCAAT	1114	5	+	Arabidopsis thaliana	common cis-acting element in promoter and enhancer regions
Solyc06g072430	CAAT-box	CAAT	1115	4	+	Nicotiana glutinosa
Solyc06g072430	CAAT-box	CAAT	1168	4	-	Nicotiana glutinosa
Solyc06g072430	CAAT-box	CAAT	1177	4	+	Nicotiana glutinosa
Solyc06g072430	CAAT-box	CAAAT	1207	5	-	Pisum sativum	common cis-acting element in promoter and enhancer regions
Solyc06g072430	CAAT-box	CCAAT	1255	5	-	Arabidopsis thaliana	common cis-acting element in promoter and enhancer regions
Solyc06g072430	CAAT-box	CAAT	1276	4	-	Nicotiana glutinosa
Solyc06g072430	CAAT-box	CAAT	1427	4	-	Nicotiana glutinosa
Solyc06g072430	CAAT-box	CAAT	1466	4	+	Nicotiana glutinosa
Solyc06g072430	TCT-motif	TCTTAC	144	6	-	Arabidopsis thaliana	part of a light responsive element
Solyc06g072430	MYB-like sequence	TAACCA	667	6	-	Arabidopsis thaliana
Solyc06g072430	MYB-like sequence	TAACCA	675	6	-	Arabidopsis thaliana
Solyc06g072430	MYB-like sequence	TAACCA	1257	6	-	Arabidopsis thaliana
Solyc06g072430	AT-rich element	ATAGAAATCAA	573	10	-	Glycine max	binding site of AT-rich DNA binding protein (ATBP-1)
Solyc06g072430	AT-rich element	ATAGAAATCAA	1135	10	+	Glycine max	binding site of AT-rich DNA binding protein (ATBP-1)
Solyc06g072430	GT1-motif	GGTTAAT	668	7	+	Avena sativa	light responsive element
Solyc06g072430	GT1-motif	GGTTAA	1258	6	+	Arabidopsis thaliana	light responsive element
Solyc06g072430	circadian	CAAAGATATC	1326	9	-	Lycopersicon esculentum	cis-acting regulatory element involved in circadian control
Solyc06g072430	as-1	TGACG	482	5	-	Arabidopsis thaliana
Solyc06g072430	TATA-box	taTATAAAtc	118	9	+	Arabidopsis thaliana	core promoter element around -30 of transcription start
Solyc06g072430	TATA-box	ATATAA	119	6	+	Brassica oleracea	core promoter element around -30 of transcription start
Solyc06g072430	TATA-box	TATA	120	4	+	Arabidopsis thaliana	core promoter element around -30 of transcription start
Solyc06g072430	TATA-box	ATATAT	149	6	+	Brassica napus	core promoter element around -30 of transcription start
Solyc06g072430	TATA-box	TATA	150	4	+	Arabidopsis thaliana	core promoter element around -30 of transcription start
Solyc06g072430	TATA-box	TATAAA	268	6	-	Helianthus annuus	core promoter element around -30 of transcription start
Solyc06g072430	TATA-box	TATAA	269	5	-	Arabidopsis thaliana	core promoter element around -30 of transcription start
Solyc06g072430	TATA-box	TATATTTATATTT	270	12	+	Avena sativa	core promoter element around -30 of transcription start
Solyc06g072430	TATA-box	taTATAAAtc	272	9	-	Arabidopsis thaliana	core promoter element around -30 of transcription start
Solyc06g072430	TATA-box	TATAAAT	273	7	-	Brassica juncea	core promoter element around -30 of transcription start
Solyc06g072430	TATA-box	TATAAA	274	6	-	Helianthus annuus	core promoter element around -30 of transcription start
Solyc06g072430	TATA-box	TATATAA	275	7	-	Arabidopsis thaliana	core promoter element around -30 of transcription start
Solyc06g072430	TATA-box	TATATA	276	6	+	Arabidopsis thaliana	core promoter element around -30 of transcription start
Solyc06g072430	TATA-box	ATATAT	277	6	+	Brassica napus	core promoter element around -30 of transcription start
Solyc06g072430	TATA-box	TATATA	278	6	+	Arabidopsis thaliana	core promoter element around -30 of transcription start
Solyc06g072430	TATA-box	ATATAA	279	6	+	Brassica oleracea	core promoter element around -30 of transcription start
Solyc06g072430	TATA-box	TATA	280	4	+	Arabidopsis thaliana	core promoter element around -30 of transcription start
Solyc06g072430	TATA-box	ATTATA	285	6	+	Brassica napus	core promoter element around -30 of transcription start
Solyc06g072430	TATA-box	TATAA	286	5	-	Arabidopsis thaliana	core promoter element around -30 of transcription start
Solyc06g072430	TATA-box	TATA	287	4	+	Arabidopsis thaliana	core promoter element around -30 of transcription start
Solyc06g072430	TATA-box	ATATAA	346	6	+	Brassica oleracea	core promoter element around -30 of transcription start
Solyc06g072430	TATA-box	TATA	347	4	+	Arabidopsis thaliana	core promoter element around -30 of transcription start
Solyc06g072430	TATA-box	TATAAAA	549	7	-	Pisum sativum	core promoter element around -30 of transcription start
Solyc06g072430	TATA-box	TATAAA	550	6	-	Helianthus annuus	core promoter element around -30 of transcription start
Solyc06g072430	TATA-box	TATAA	551	5	-	Arabidopsis thaliana	core promoter element around -30 of transcription start
Solyc06g072430	TATA-box	TATA	552	4	+	Arabidopsis thaliana	core promoter element around -30 of transcription start
Solyc06g072430	TATA-box	ATATAA	693	6	+	Brassica oleracea	core promoter element around -30 of transcription start
Solyc06g072430	TATA-box	TATA	694	4	+	Arabidopsis thaliana	core promoter element around -30 of transcription start
Solyc06g072430	TATA-box	taTATAAAtc	716	9	-	Arabidopsis thaliana	core promoter element around -30 of transcription start
Solyc06g072430	TATA-box	TATAAAT	717	7	-	Brassica juncea	core promoter element around -30 of transcription start
Solyc06g072430	TATA-box	TATAAA	718	6	-	Helianthus annuus	core promoter element around -30 of transcription start
Solyc06g072430	TATA-box	TATATAA	719	7	-	Arabidopsis thaliana	core promoter element around -30 of transcription start
Solyc06g072430	TATA-box	TATATA	720	6	+	Arabidopsis thaliana	core promoter element around -30 of transcription start
Solyc06g072430	TATA-box	ATATAT	721	6	+	Brassica napus	core promoter element around -30 of transcription start
Solyc06g072430	TATA-box	TATATA	722	6	+	Arabidopsis thaliana	core promoter element around -30 of transcription start
Solyc06g072430	TATA-box	ATATAT	723	6	+	Brassica napus	core promoter element around -30 of transcription start
Solyc06g072430	TATA-box	TATATA	724	6	+	Arabidopsis thaliana	core promoter element around -30 of transcription start
Solyc06g072430	TATA-box	ATATAT	725	6	+	Brassica napus	core promoter element around -30 of transcription start
Solyc06g072430	TATA-box	TATATA	726	6	+	Arabidopsis thaliana	core promoter element around -30 of transcription start
Solyc06g072430	TATA-box	ATATAT	727	6	+	Brassica napus	core promoter element around -30 of transcription start
Solyc06g072430	TATA-box	TATATA	728	6	+	Arabidopsis thaliana	core promoter element around -30 of transcription start
Solyc06g072430	TATA-box	ATATAT	729	6	+	Brassica napus	core promoter element around -30 of transcription start
Solyc06g072430	TATA-box	TATATA	730	6	+	Arabidopsis thaliana	core promoter element around -30 of transcription start
Solyc06g072430	TATA-box	ATATAT	731	6	+	Brassica napus	core promoter element around -30 of transcription start
Solyc06g072430	TATA-box	TATATA	732	6	+	Arabidopsis thaliana	core promoter element around -30 of transcription start
Solyc06g072430	TATA-box	ATATAT	733	6	+	Brassica napus	core promoter element around -30 of transcription start
Solyc06g072430	TATA-box	TATATA	734	6	+	Arabidopsis thaliana	core promoter element around -30 of transcription start
Solyc06g072430	TATA-box	ATATAT	735	6	+	Brassica napus	core promoter element around -30 of transcription start
Solyc06g072430	TATA-box	TATATA	736	6	+	Arabidopsis thaliana	core promoter element around -30 of transcription start
Solyc06g072430	TATA-box	ATATAT	737	6	+	Brassica napus	core promoter element around -30 of transcription start
Solyc06g072430	TATA-box	TATATA	738	6	+	Arabidopsis thaliana	core promoter element around -30 of transcription start
Solyc06g072430	TATA-box	ATATAT	739	6	+	Brassica napus	core promoter element around -30 of transcription start
Solyc06g072430	TATA-box	TATATA	740	6	+	Arabidopsis thaliana	core promoter element around -30 of transcription start
Solyc06g072430	TATA-box	ATATAT	741	6	+	Brassica napus	core promoter element around -30 of transcription start
Solyc06g072430	TATA-box	TATATA	742	6	+	Arabidopsis thaliana	core promoter element around -30 of transcription start
Solyc06g072430	TATA-box	ATATAT	743	6	+	Brassica napus	core promoter element around -30 of transcription start
Solyc06g072430	TATA-box	TATATA	744	6	+	Arabidopsis thaliana	core promoter element around -30 of transcription start
Solyc06g072430	TATA-box	ATATAA	745	6	+	Brassica oleracea	core promoter element around -30 of transcription start
Solyc06g072430	TATA-box	TATA	746	4	+	Arabidopsis thaliana	core promoter element around -30 of transcription start
Solyc06g072430	TATA-box	TATA	766	4	-	Arabidopsis thaliana	core promoter element around -30 of transcription start
Solyc06g072430	TATA-box	TATTTAAA	773	8	-	Arabidopsis thaliana	core promoter element around -30 of transcription start
Solyc06g072430	TATA-box	taTATAAAtc	777	9	+	Arabidopsis thaliana	core promoter element around -30 of transcription start
Solyc06g072430	TATA-box	ATATAA	778	6	+	Brassica oleracea	core promoter element around -30 of transcription start
Solyc06g072430	TATA-box	TATA	779	4	-	Arabidopsis thaliana	core promoter element around -30 of transcription start
Solyc06g072430	TATA-box	TATA	819	4	-	Arabidopsis thaliana	core promoter element around -30 of transcription start
Solyc06g072430	TATA-box	ATTATA	826	6	+	Brassica napus	core promoter element around -30 of transcription start
Solyc06g072430	TATA-box	TATAA	827	5	-	Arabidopsis thaliana	core promoter element around -30 of transcription start
Solyc06g072430	TATA-box	TATA	828	4	-	Arabidopsis thaliana	core promoter element around -30 of transcription start
Solyc06g072430	TATA-box	ATATAA	841	6	+	Brassica oleracea	core promoter element around -30 of transcription start
Solyc06g072430	TATA-box	TATA	842	4	-	Arabidopsis thaliana	core promoter element around -30 of transcription start
Solyc06g072430	TATA-box	ATTATA	860	6	+	Brassica napus	core promoter element around -30 of transcription start
Solyc06g072430	TATA-box	TATAA	861	5	-	Arabidopsis thaliana	core promoter element around -30 of transcription start
Solyc06g072430	TATA-box	TATA	862	4	-	Arabidopsis thaliana	core promoter element around -30 of transcription start
Solyc06g072430	TATA-box	TATATA	920	6	-	Arabidopsis thaliana	core promoter element around -30 of transcription start
Solyc06g072430	TATA-box	ATATAT	921	6	-	Brassica napus	core promoter element around -30 of transcription start
Solyc06g072430	TATA-box	TATATA	922	6	-	Arabidopsis thaliana	core promoter element around -30 of transcription start
Solyc06g072430	TATA-box	ATATAT	923	6	-	Brassica napus	core promoter element around -30 of transcription start
Solyc06g072430	TATA-box	TATATA	924	6	-	Arabidopsis thaliana	core promoter element around -30 of transcription start
Solyc06g072430	TATA-box	ATATAA	925	6	+	Brassica oleracea	core promoter element around -30 of transcription start
Solyc06g072430	TATA-box	TATA	926	4	-	Arabidopsis thaliana	core promoter element around -30 of transcription start
Solyc06g072430	TATA-box	taTATAAAtc	929	9	-	Arabidopsis thaliana	core promoter element around -30 of transcription start
Solyc06g072430	TATA-box	TATAAAT	930	7	-	Brassica juncea	core promoter element around -30 of transcription start
Solyc06g072430	TATA-box	TATAAA	931	6	-	Helianthus annuus	core promoter element around -30 of transcription start
Solyc06g072430	TATA-box	TATATAA	932	7	-	Arabidopsis thaliana	core promoter element around -30 of transcription start
Solyc06g072430	TATA-box	TATATA	933	6	-	Arabidopsis thaliana	core promoter element around -30 of transcription start
Solyc06g072430	TATA-box	ATATAA	934	6	+	Brassica oleracea	core promoter element around -30 of transcription start
Solyc06g072430	TATA-box	TATA	935	4	-	Arabidopsis thaliana	core promoter element around -30 of transcription start
Solyc06g072430	TATA-box	ATATAA	939	6	+	Brassica oleracea	core promoter element around -30 of transcription start
Solyc06g072430	TATA-box	TATA	940	4	-	Arabidopsis thaliana	core promoter element around -30 of transcription start
Solyc06g072430	TATA-box	ATTATA	1017	6	+	Brassica napus	core promoter element around -30 of transcription start
Solyc06g072430	TATA-box	TATAA	1018	5	-	Arabidopsis thaliana	core promoter element around -30 of transcription start
Solyc06g072430	TATA-box	TATA	1019	4	-	Arabidopsis thaliana	core promoter element around -30 of transcription start
Solyc06g072430	TATA-box	TATATA	1103	6	-	Arabidopsis thaliana	core promoter element around -30 of transcription start
Solyc06g072430	TATA-box	ATATAA	1104	6	+	Brassica oleracea	core promoter element around -30 of transcription start
Solyc06g072430	TATA-box	TATA	1105	4	-	Arabidopsis thaliana	core promoter element around -30 of transcription start
Solyc06g072430	TATA-box	ATATAA	1117	6	+	Brassica oleracea	core promoter element around -30 of transcription start
Solyc06g072430	TATA-box	TATA	1118	4	-	Arabidopsis thaliana	core promoter element around -30 of transcription start
Solyc06g072430	TATA-box	TATA	1243	4	-	Arabidopsis thaliana	core promoter element around -30 of transcription start
Solyc06g072430	TATA-box	ATTATA	1281	6	+	Brassica napus	core promoter element around -30 of transcription start
Solyc06g072430	TATA-box	TATAA	1282	5	-	Arabidopsis thaliana	core promoter element around -30 of transcription start
Solyc06g072430	TATA-box	TATA	1283	4	-	Arabidopsis thaliana	core promoter element around -30 of transcription start
Solyc06g072430	TATA-box	TATA	1433	4	-	Arabidopsis thaliana	core promoter element around -30 of transcription start
Solyc06g072430	TATA-box	ATATAT	1468	6	-	Brassica napus	core promoter element around -30 of transcription start
Solyc06g072430	TATA-box	TATATA	1469	6	-	Arabidopsis thaliana	core promoter element around -30 of transcription start
Solyc06g072430	TATA-box	ATATAT	1470	6	-	Brassica napus	core promoter element around -30 of transcription start
Solyc06g072430	TATA-box	TATA	1471	4	-	Arabidopsis thaliana	core promoter element around -30 of transcription start
Solyc06g072430	Myb	CAACTG	1372	6	-	Arabidopsis thaliana
Solyc06g072430	TGACG-motif	TGACG	482	5	-	Hordeum vulgare	cis-acting regulatory element involved in the MeJA-responsiveness
Solyc06g072430	MYB	TAACCA	667	6	-	Arabidopsis thaliana
Solyc06g072430	MYB	TAACCA	675	6	-	Arabidopsis thaliana
Solyc06g072430	MYB	TAACCA	1257	6	-	Arabidopsis thaliana
Solyc06g072430	CGTCA-motif	CGTCA	482	5	+	Hordeum vulgare	cis-acting regulatory element involved in the MeJA-responsiveness
Solyc06g072430	MBS	CAACTG	1372	6	-	Arabidopsis thaliana	MYB binding site involved in drought-inducibility
Solyc06g072430		motif_sequence	218	4	-	organism	short_function
Solyc06g072430		motif_sequence	351	4	+	organism	short_function
Solyc06g072430		motif_sequence	527	4	-	organism	short_function
Solyc06g072430		motif_sequence	912	4	+	organism	short_function
Solyc06g072430		motif_sequence	914	4	-	organism	short_function
Solyc06g072430		motif_sequence	1295	4	-	organism	short_function
Solyc06g072430	AT~TATA-box	TATATAAA	274	8	-	Arabidopsis thaliana
Solyc06g072430	AT~TATA-box	TATATA	276	6	+	Arabidopsis thaliana
Solyc06g072430	AT~TATA-box	TATATA	278	6	+	Arabidopsis thaliana
Solyc06g072430	AT~TATA-box	TATATAAA	718	8	-	Arabidopsis thaliana
Solyc06g072430	AT~TATA-box	TATATA	720	6	+	Arabidopsis thaliana
Solyc06g072430	AT~TATA-box	TATATA	722	6	+	Arabidopsis thaliana
Solyc06g072430	AT~TATA-box	TATATA	724	6	+	Arabidopsis thaliana
Solyc06g072430	AT~TATA-box	TATATA	726	6	+	Arabidopsis thaliana
Solyc06g072430	AT~TATA-box	TATATA	728	6	+	Arabidopsis thaliana
Solyc06g072430	AT~TATA-box	TATATA	730	6	+	Arabidopsis thaliana
Solyc06g072430	AT~TATA-box	TATATA	732	6	+	Arabidopsis thaliana
Solyc06g072430	AT~TATA-box	TATATA	734	6	+	Arabidopsis thaliana
Solyc06g072430	AT~TATA-box	TATATA	736	6	+	Arabidopsis thaliana
Solyc06g072430	AT~TATA-box	TATATA	738	6	+	Arabidopsis thaliana
Solyc06g072430	AT~TATA-box	TATATA	740	6	+	Arabidopsis thaliana
Solyc06g072430	AT~TATA-box	TATATA	742	6	+	Arabidopsis thaliana
Solyc06g072430	AT~TATA-box	TATATA	744	6	+	Arabidopsis thaliana
Solyc06g072430	AT~TATA-box	TATATA	920	6	-	Arabidopsis thaliana
Solyc06g072430	AT~TATA-box	TATATA	922	6	-	Arabidopsis thaliana
Solyc06g072430	AT~TATA-box	TATATA	924	6	-	Arabidopsis thaliana
Solyc06g072430	AT~TATA-box	TATATAAA	931	8	-	Arabidopsis thaliana
Solyc06g072430	AT~TATA-box	TATATA	933	6	-	Arabidopsis thaliana
Solyc06g072430	AT~TATA-box	TATATA	1103	6	-	Arabidopsis thaliana
Solyc06g072430	AT~TATA-box	TATATA	1469	6	-	Arabidopsis thaliana
Solyc06g072430	ERE	ATTTTAAA	1230	8	-	Nicotiana glutinos
Solyc06g072430	AAGAA-motif	GAAAGAA	1381	7	-	Avena sativa
Solyc08g080320		motif_sequence	18	4	-	organism	short_function
Solyc08g080320		motif_sequence	294	4	-	organism	short_function
Solyc08g080320		motif_sequence	558	4	+	organism	short_function
Solyc08g080320		motif_sequence	726	4	+	organism	short_function
Solyc08g080320	MBS	CAACTG	302	6	-	Arabidopsis thaliana	MYB binding site involved in drought-inducibility
Solyc08g080320	Myb	CAACTG	302	6	-	Arabidopsis thaliana
Solyc08g080320	TATA-box	TAAAGATT	42	8	-	Arabidopsis thaliana	core promoter element around -30 of transcription start
Solyc08g080320	TATA-box	TATA	100	4	+	Arabidopsis thaliana	core promoter element around -30 of transcription start
Solyc08g080320	TATA-box	ATTATA	111	6	+	Brassica napus	core promoter element around -30 of transcription start
Solyc08g080320	TATA-box	TATAA	112	5	-	Arabidopsis thaliana	core promoter element around -30 of transcription start
Solyc08g080320	TATA-box	TATA	113	4	+	Arabidopsis thaliana	core promoter element around -30 of transcription start
Solyc08g080320	TATA-box	TACAAAA	126	7	+	Oryza sativa	core promoter element around -30 of transcription start
Solyc08g080320	TATA-box	TATACA	167	6	-	Helianthus annuus	core promoter element around -30 of transcription start
Solyc08g080320	TATA-box	TATA	169	4	+	Arabidopsis thaliana	core promoter element around -30 of transcription start
Solyc08g080320	TATA-box	ATTATA	325	6	+	Brassica napus	core promoter element around -30 of transcription start
Solyc08g080320	TATA-box	TATAA	326	5	-	Arabidopsis thaliana	core promoter element around -30 of transcription start
Solyc08g080320	TATA-box	TATA	327	4	+	Arabidopsis thaliana	core promoter element around -30 of transcription start
Solyc08g080320	TATA-box	TATAAAA	347	7	-	Pisum sativum	core promoter element around -30 of transcription start
Solyc08g080320	TATA-box	TATAAA	348	6	-	Helianthus annuus	core promoter element around -30 of transcription start
Solyc08g080320	TATA-box	TATAA	349	5	-	Arabidopsis thaliana	core promoter element around -30 of transcription start
Solyc08g080320	TATA-box	TATA	350	4	+	Arabidopsis thaliana	core promoter element around -30 of transcription start
Solyc08g080320	TATA-box	ATATAT	384	6	+	Brassica napus	core promoter element around -30 of transcription start
Solyc08g080320	TATA-box	TATATA	385	6	+	Arabidopsis thaliana	core promoter element around -30 of transcription start
Solyc08g080320	TATA-box	ATATAT	386	6	+	Brassica napus	core promoter element around -30 of transcription start
Solyc08g080320	TATA-box	TATATA	387	6	+	Arabidopsis thaliana	core promoter element around -30 of transcription start
Solyc08g080320	TATA-box	ATATAT	388	6	+	Brassica napus	core promoter element around -30 of transcription start
Solyc08g080320	TATA-box	TATATA	389	6	+	Arabidopsis thaliana	core promoter element around -30 of transcription start
Solyc08g080320	TATA-box	ATATAT	390	6	+	Brassica napus	core promoter element around -30 of transcription start
Solyc08g080320	TATA-box	TATATA	391	6	+	Arabidopsis thaliana	core promoter element around -30 of transcription start
Solyc08g080320	TATA-box	ATATAT	392	6	+	Brassica napus	core promoter element around -30 of transcription start
Solyc08g080320	TATA-box	TATATA	393	6	+	Arabidopsis thaliana	core promoter element around -30 of transcription start
Solyc08g080320	TATA-box	ATATAT	394	6	+	Brassica napus	core promoter element around -30 of transcription start
Solyc08g080320	TATA-box	TATATA	395	6	+	Arabidopsis thaliana	core promoter element around -30 of transcription start
Solyc08g080320	TATA-box	ATATAT	396	6	+	Brassica napus	core promoter element around -30 of transcription start
Solyc08g080320	TATA-box	TATATA	397	6	+	Arabidopsis thaliana	core promoter element around -30 of transcription start
Solyc08g080320	TATA-box	ATATAT	398	6	+	Brassica napus	core promoter element around -30 of transcription start
Solyc08g080320	TATA-box	TATATA	399	6	+	Arabidopsis thaliana	core promoter element around -30 of transcription start
Solyc08g080320	TATA-box	ATATAT	400	6	+	Brassica napus	core promoter element around -30 of transcription start
Solyc08g080320	TATA-box	TATATA	401	6	+	Arabidopsis thaliana	core promoter element around -30 of transcription start
Solyc08g080320	TATA-box	ATATAT	402	6	+	Brassica napus	core promoter element around -30 of transcription start
Solyc08g080320	TATA-box	TATATA	403	6	+	Arabidopsis thaliana	core promoter element around -30 of transcription start
Solyc08g080320	TATA-box	ATATAT	404	6	+	Brassica napus	core promoter element around -30 of transcription start
Solyc08g080320	TATA-box	TATATA	405	6	+	Arabidopsis thaliana	core promoter element around -30 of transcription start
Solyc08g080320	TATA-box	ATATAT	406	6	+	Brassica napus	core promoter element around -30 of transcription start
Solyc08g080320	TATA-box	TATA	407	4	+	Arabidopsis thaliana	core promoter element around -30 of transcription start
Solyc08g080320	TATA-box	TATACA	592	6	-	Helianthus annuus	core promoter element around -30 of transcription start
Solyc08g080320	TATA-box	TATA	594	4	+	Arabidopsis thaliana	core promoter element around -30 of transcription start
Solyc08g080320	TATA-box	ATTATA	616	6	+	Brassica napus	core promoter element around -30 of transcription start
Solyc08g080320	TATA-box	TATAA	617	5	-	Arabidopsis thaliana	core promoter element around -30 of transcription start
Solyc08g080320	TATA-box	TATA	618	4	+	Arabidopsis thaliana	core promoter element around -30 of transcription start
Solyc08g080320	TATA-box	TATAAAT	629	7	-	Brassica juncea	core promoter element around -30 of transcription start
Solyc08g080320	TATA-box	TATAAA	630	6	-	Helianthus annuus	core promoter element around -30 of transcription start
Solyc08g080320	TATA-box	TATAA	631	5	-	Arabidopsis thaliana	core promoter element around -30 of transcription start
Solyc08g080320	TATA-box	TATA	632	4	+	Arabidopsis thaliana	core promoter element around -30 of transcription start
Solyc08g080320	TATA-box	ATTATA	806	6	+	Brassica napus	core promoter element around -30 of transcription start
Solyc08g080320	TATA-box	TATAA	807	5	-	Arabidopsis thaliana	core promoter element around -30 of transcription start
Solyc08g080320	TATA-box	TATA	808	4	-	Arabidopsis thaliana	core promoter element around -30 of transcription start
Solyc08g080320	TATA-box	ATTATA	822	6	+	Brassica napus	core promoter element around -30 of transcription start
Solyc08g080320	TATA-box	TATAA	823	5	-	Arabidopsis thaliana	core promoter element around -30 of transcription start
Solyc08g080320	TATA-box	TATA	824	4	-	Arabidopsis thaliana	core promoter element around -30 of transcription start
Solyc08g080320	TATA-box	TATA	849	4	-	Arabidopsis thaliana	core promoter element around -30 of transcription start
Solyc08g080320	TATA-box	TATTTAAA	855	8	-	Arabidopsis thaliana	core promoter element around -30 of transcription start
Solyc08g080320	TATA-box	ATATAA	860	6	+	Brassica oleracea	core promoter element around -30 of transcription start
Solyc08g080320	TATA-box	TATA	861	4	-	Arabidopsis thaliana	core promoter element around -30 of transcription start
Solyc08g080320	TATA-box	ATATAA	871	6	+	Brassica oleracea	core promoter element around -30 of transcription start
Solyc08g080320	TATA-box	TATA	872	4	-	Arabidopsis thaliana	core promoter element around -30 of transcription start
Solyc08g080320	TATA-box	TATATTTATATTT	894	12	-	Avena sativa	core promoter element around -30 of transcription start
Solyc08g080320	TATA-box	TATA	903	4	-	Arabidopsis thaliana	core promoter element around -30 of transcription start
Solyc08g080320	TATA-box	TATA	946	4	-	Arabidopsis thaliana	core promoter element around -30 of transcription start
Solyc08g080320	TATA-box	TATAAAA	1053	7	-	Pisum sativum	core promoter element around -30 of transcription start
Solyc08g080320	TATA-box	TATAAA	1054	6	-	Helianthus annuus	core promoter element around -30 of transcription start
Solyc08g080320	TATA-box	TATAA	1055	5	-	Arabidopsis thaliana	core promoter element around -30 of transcription start
Solyc08g080320	TATA-box	TATA	1056	4	-	Arabidopsis thaliana	core promoter element around -30 of transcription start
Solyc08g080320	TATA-box	ATATAT	1071	6	-	Brassica napus	core promoter element around -30 of transcription start
Solyc08g080320	TATA-box	TATA	1072	4	-	Arabidopsis thaliana	core promoter element around -30 of transcription start
Solyc08g080320	TATA-box	TATA	1163	4	-	Arabidopsis thaliana	core promoter element around -30 of transcription start
Solyc08g080320	TATA-box	ATTATA	1167	6	+	Brassica napus	core promoter element around -30 of transcription start
Solyc08g080320	TATA-box	TATAA	1168	5	-	Arabidopsis thaliana	core promoter element around -30 of transcription start
Solyc08g080320	TATA-box	TATA	1169	4	-	Arabidopsis thaliana	core promoter element around -30 of transcription start
Solyc08g080320	TATA-box	TACAAAA	1290	7	+	Oryza sativa	core promoter element around -30 of transcription start
Solyc08g080320	TATA-box	ATTATA	1307	6	+	Brassica napus	core promoter element around -30 of transcription start
Solyc08g080320	TATA-box	TATAA	1308	5	-	Arabidopsis thaliana	core promoter element around -30 of transcription start
Solyc08g080320	TATA-box	TATA	1309	4	-	Arabidopsis thaliana	core promoter element around -30 of transcription start
Solyc08g080320	G-box	TACGTG	189	6	+	Arabidopsis thaliana	cis-acting regulatory element involved in light responsiveness
Solyc08g080320	G-box	TACGTG	657	6	-	Arabidopsis thaliana	cis-acting regulatory element involved in light responsiveness
Solyc08g080320	G-box	ACACGTGT	886	8	-	Brassica napus	cis-acting regulatory element involved in light responsiveness
Solyc08g080320	G-box	CACGTG	887	6	-	Arabidopsis thaliana	cis-acting regulatory element involved in light responsiveness
Solyc08g080320	circadian	CAAAGATATC	363	9	+	Lycopersicon esculentum	cis-acting regulatory element involved in circadian control
Solyc08g080320	GT1-motif	GGTTAA	926	6	+	Arabidopsis thaliana	light responsive element
Solyc08g080320	TCA-element	CCATCTTTTT	372	9	+	Nicotiana tabacum	cis-acting element involved in salicylic acid responsiveness
Solyc08g080320	TCCC-motif	TCTCCCT	1208	7	+	Spinacia oleracea	part of a light responsive element
Solyc08g080320	ABRE3a	TACGTG	189	6	+	Zea mays
Solyc08g080320	ABRE3a	TACGTG	657	6	-	Zea mays
Solyc08g080320	TC-rich repeats	ATTCTCTAAC	942	9	+	Nicotiana tabacum	cis-acting element involved in defense and stress responsiveness
Solyc08g080320	CAAT-box	CAAAT	14	5	-	Pisum sativum	common cis-acting element in promoter and enhancer regions
Solyc08g080320	CAAT-box	CAAT	28	4	+	Nicotiana glutinosa
Solyc08g080320	CAAT-box	CAAT	30	4	-	Nicotiana glutinosa
Solyc08g080320	CAAT-box	CAAT	120	4	-	Nicotiana glutinosa
Solyc08g080320	CAAT-box	TGCCAAC	304	7	-	Petunia hybrida	common cis-acting element in promoter and enhancer regions
Solyc08g080320	CAAT-box	CCAAT	319	5	+	Arabidopsis thaliana	common cis-acting element in promoter and enhancer regions
Solyc08g080320	CAAT-box	CAAT	320	4	+	Nicotiana glutinosa
Solyc08g080320	CAAT-box	CAAT	372	4	+	Nicotiana glutinosa
Solyc08g080320	CAAT-box	CAAAT	412	5	+	Pisum sativum	common cis-acting element in promoter and enhancer regions
Solyc08g080320	CAAT-box	CCAAT	437	5	+	Arabidopsis thaliana	common cis-acting element in promoter and enhancer regions
Solyc08g080320	CAAT-box	CAAT	438	4	+	Nicotiana glutinosa
Solyc08g080320	CAAT-box	CAAT	496	4	+	Nicotiana glutinosa
Solyc08g080320	CAAT-box	CAAAT	504	5	-	Pisum sativum	common cis-acting element in promoter and enhancer regions
Solyc08g080320	CAAT-box	CAAT	533	4	+	Nicotiana glutinosa
Solyc08g080320	CAAT-box	CAAT	604	4	+	Nicotiana glutinosa
Solyc08g080320	CAAT-box	CAAT	672	4	-	Nicotiana glutinosa
Solyc08g080320	CAAT-box	CAAAT	718	5	+	Pisum sativum	common cis-acting element in promoter and enhancer regions
Solyc08g080320	CAAT-box	CAAAT	758	5	+	Pisum sativum	common cis-acting element in promoter and enhancer regions
Solyc08g080320	CAAT-box	CAAAT	837	5	-	Pisum sativum	common cis-acting element in promoter and enhancer regions
Solyc08g080320	CAAT-box	CAAT	880	4	-	Nicotiana glutinosa
Solyc08g080320	CAAT-box	CAAT	981	4	-	Nicotiana glutinosa
Solyc08g080320	CAAT-box	CAAAT	1096	5	+	Pisum sativum	common cis-acting element in promoter and enhancer regions
Solyc08g080320	CAAT-box	CAAT	1119	4	+	Nicotiana glutinosa
Solyc08g080320	CAAT-box	CAAT	1262	4	+	Nicotiana glutinosa
Solyc08g080320	CAAT-box	CAAT	1319	4	+	Nicotiana glutinosa
Solyc08g080320	CAAT-box	CAAT	1326	4	-	Nicotiana glutinosa
Solyc08g080320	CAAT-box	CAAT	1346	4	-	Nicotiana glutinosa
Solyc08g080320	CAAT-box	CAAAT	1435	5	+	Pisum sativum	common cis-acting element in promoter and enhancer regions
Solyc08g080320	CAAT-box	CCAAT	1481	5	-	Arabidopsis thaliana	common cis-acting element in promoter and enhancer regions
Solyc08g080320	TCA	TCATCTTCAT	556	9	+	Pisum sativum
Solyc08g080320	AE-box	AGAAACTT	1156	8	-	Arabidopsis thaliana	part of a module for light response
Solyc08g080320	AE-box	AGAAACTT	1196	8	-	Arabidopsis thaliana	part of a module for light response
Solyc08g080320	G-Box	CACGTG	887	6	-	Pisum sativum	cis-acting regulatory element involved in light responsiveness
Solyc08g080320	ERE	ATTTTAAA	853	8	+	Nicotiana glutinos
Solyc08g080320	AT~TATA-box	TATATA	385	6	+	Arabidopsis thaliana
Solyc08g080320	AT~TATA-box	TATATA	387	6	+	Arabidopsis thaliana
Solyc08g080320	AT~TATA-box	TATATA	389	6	+	Arabidopsis thaliana
Solyc08g080320	AT~TATA-box	TATATA	391	6	+	Arabidopsis thaliana
Solyc08g080320	AT~TATA-box	TATATA	393	6	+	Arabidopsis thaliana
Solyc08g080320	AT~TATA-box	TATATA	395	6	+	Arabidopsis thaliana
Solyc08g080320	AT~TATA-box	TATATA	397	6	+	Arabidopsis thaliana
Solyc08g080320	AT~TATA-box	TATATA	399	6	+	Arabidopsis thaliana
Solyc08g080320	AT~TATA-box	TATATA	401	6	+	Arabidopsis thaliana
Solyc08g080320	AT~TATA-box	TATATA	403	6	+	Arabidopsis thaliana
Solyc08g080320	AT~TATA-box	TATATA	405	6	+	Arabidopsis thaliana
Solyc08g080320	ABRE4	CACGTA	189	6	-	Zea mays
Solyc08g080320	ABRE4	CACGTA	657	6	+	Zea mays
Solyc08g080320	chs-CMA1a	TTACTTAA	917	8	-	Daucus carota	part of a light responsive element
Solyc08g080320	ABRE	ACGTG	190	5	+	Arabidopsis thaliana	cis-acting element involved in the abscisic acid responsiveness
Solyc08g080320	ABRE	ACGTG	657	5	-	Arabidopsis thaliana	cis-acting element involved in the abscisic acid responsiveness
Solyc08g080320	ABRE	CACGTG	887	6	-	Arabidopsis thaliana	cis-acting element involved in the abscisic acid responsiveness
Solyc08g080320	ABRE	ACGTG	888	5	+	Arabidopsis thaliana	cis-acting element involved in the abscisic acid responsiveness
Solyc08g080320	Unnamed__4	CTCC	89	4	-	Petroselinum hortense
Solyc08g080320	Unnamed__4	CTCC	422	4	+	Petroselinum hortense
Solyc08g080320	Unnamed__4	CTCC	646	4	+	Petroselinum hortense
Solyc08g080320	Unnamed__4	CTCC	956	4	-	Petroselinum hortense
Solyc08g080320	Unnamed__4	CTCC	1083	4	+	Petroselinum hortense
Solyc08g080320	Unnamed__4	CTCC	1136	4	+	Petroselinum hortense
Solyc08g080320	Unnamed__4	CTCC	1209	4	+	Petroselinum hortense
Solyc08g080320	W box	TTGACC	313	6	+	Arabidopsis thaliana
Solyc08g080320	MYC	CAATTG	28	6	+	Arabidopsis thaliana
Solyc08g080320	Box 4	ATTAAT	39	6	+	Petroselinum crispum	part of a conserved DNA module involved in light responsiveness
Solyc08g080320	Box 4	ATTAAT	155	6	+	Petroselinum crispum	part of a conserved DNA module involved in light responsiveness
Solyc08g080320	Box 4	ATTAAT	335	6	+	Petroselinum crispum	part of a conserved DNA module involved in light responsiveness
Solyc08g080320	Box 4	ATTAAT	538	6	+	Petroselinum crispum	part of a conserved DNA module involved in light responsiveness
Solyc08g080320	Box 4	ATTAAT	677	6	+	Petroselinum crispum	part of a conserved DNA module involved in light responsiveness
Solyc08g080320	AC-I	(T/C)C(T/C)(C/T)ACC(T/C)ACC	1085	9	+	Phaseolus vulgaris
Solyc08g080320	ARE	AAACCA	1269	6	+	Zea mays	cis-acting regulatory element essential for the anaerobic induction
Solyc08g080320	ARE	AAACCA	1367	6	-	Zea mays	cis-acting regulatory element essential for the anaerobic induction
Solyc10g084170	TCA	TCATCTTCAT	872	9	+	Pisum sativum
Solyc10g084170	TCA	TCATCTTCAT	970	9	-	Pisum sativum
Solyc10g084170	ARE	AAACCA	762	6	+	Zea mays	cis-acting regulatory element essential for the anaerobic induction
Solyc10g084170	ARE	AAACCA	1002	6	+	Zea mays	cis-acting regulatory element essential for the anaerobic induction
Solyc10g084170	ABRE3a	TACGTG	297	6	+	Zea mays
Solyc10g084170	CAAT-box	CAAT	142	4	+	Nicotiana glutinosa
Solyc10g084170	CAAT-box	CAAAT	230	5	+	Pisum sativum	common cis-acting element in promoter and enhancer regions
Solyc10g084170	CAAT-box	CAAAT	243	5	-	Pisum sativum	common cis-acting element in promoter and enhancer regions
Solyc10g084170	CAAT-box	CAAT	318	4	-	Nicotiana glutinosa
Solyc10g084170	CAAT-box	CAAT	331	4	-	Nicotiana glutinosa
Solyc10g084170	CAAT-box	TGCCAAC	333	7	+	Petunia hybrida	common cis-acting element in promoter and enhancer regions
Solyc10g084170	CAAT-box	CAAT	382	4	+	Nicotiana glutinosa
Solyc10g084170	CAAT-box	CAAT	386	4	-	Nicotiana glutinosa
Solyc10g084170	CAAT-box	CAAT	449	4	+	Nicotiana glutinosa
Solyc10g084170	CAAT-box	CAAT	469	4	+	Nicotiana glutinosa
Solyc10g084170	CAAT-box	CAAT	492	4	-	Nicotiana glutinosa
Solyc10g084170	CAAT-box	CAAT	557	4	+	Nicotiana glutinosa
Solyc10g084170	CAAT-box	CCAAT	840	5	-	Arabidopsis thaliana	common cis-acting element in promoter and enhancer regions
Solyc10g084170	CAAT-box	CCAAT	922	5	+	Arabidopsis thaliana	common cis-acting element in promoter and enhancer regions
Solyc10g084170	CAAT-box	CAAT	923	4	+	Nicotiana glutinosa
Solyc10g084170	CAAT-box	CAAT	987	4	-	Nicotiana glutinosa
Solyc10g084170	CAAT-box	CCAAT	1019	5	+	Arabidopsis thaliana	common cis-acting element in promoter and enhancer regions
Solyc10g084170	CAAT-box	CAAT	1020	4	+	Nicotiana glutinosa
Solyc10g084170	CAAT-box	CAAT	1086	4	-	Nicotiana glutinosa
Solyc10g084170	CAAT-box	CAAT	1212	4	-	Nicotiana glutinosa
Solyc10g084170	CAAT-box	CAAAT	1241	5	-	Pisum sativum	common cis-acting element in promoter and enhancer regions
Solyc10g084170	CAAT-box	CAAAT	1261	5	-	Pisum sativum	common cis-acting element in promoter and enhancer regions
Solyc10g084170	CAAT-box	CAAT	1297	4	+	Nicotiana glutinosa
Solyc10g084170	CAAT-box	CAAT	1310	4	-	Nicotiana glutinosa
Solyc10g084170	CAAT-box	CAAT	1399	4	+	Nicotiana glutinosa
Solyc10g084170	CAAT-box	CAAAT	1425	5	+	Pisum sativum	common cis-acting element in promoter and enhancer regions
Solyc10g084170	CAAT-box	CAAT	1453	4	-	Nicotiana glutinosa
Solyc10g084170	ATCT-motif	AATCTAATCC	1437	9	+	Pisum sativum	part of a conserved DNA module involved in light responsiveness
Solyc10g084170	TCT-motif	TCTTAC	910	6	-	Arabidopsis thaliana	part of a light responsive element
Solyc10g084170	GT1-motif	GGTTAA	1153	6	-	Arabidopsis thaliana	light responsive element
Solyc10g084170	GT1-motif	GGTTAA	1195	6	-	Arabidopsis thaliana	light responsive element
Solyc10g084170	O2-site	GATGACATGG	195	9	+	Zea mays	cis-acting regulatory element involved in zein metabolism regulation
Solyc10g084170	O2-site	GATGA(C/T)(A/G)TG(A/G)	867	8	-	Zea mays	cis-acting regulatory element involved in zein metabolism regulation
Solyc10g084170	MYC	CATGTG	164	6	-	Arabidopsis thaliana
Solyc10g084170	TATA-box	TATA	749	4	+	Arabidopsis thaliana	core promoter element around -30 of transcription start
Solyc10g084170	TATA-box	TATA	1268	4	-	Arabidopsis thaliana	core promoter element around -30 of transcription start
Solyc10g084170	TATA-box	TATA	1283	4	-	Arabidopsis thaliana	core promoter element around -30 of transcription start
Solyc10g084170	TATA-box	TACAAAA	1462	7	+	Oryza sativa	core promoter element around -30 of transcription start
Solyc10g084170	G-box	CACGTG	290	6	+	Arabidopsis thaliana	cis-acting regulatory element involved in light responsiveness
Solyc10g084170	G-box	TACGTG	297	6	+	Arabidopsis thaliana	cis-acting regulatory element involved in light responsiveness
Solyc10g084170	G-box	CACGTG	535	6	+	Arabidopsis thaliana	cis-acting regulatory element involved in light responsiveness
Solyc10g084170	chs-CMA2a	TCACTTGA	966	8	+	Petroselinum crispum	part of a light responsive element
Solyc10g084170	ABRE	CACGTG	290	6	+	Arabidopsis thaliana	cis-acting element involved in the abscisic acid responsiveness
Solyc10g084170	ABRE	ACGTG	291	5	+	Arabidopsis thaliana	cis-acting element involved in the abscisic acid responsiveness
Solyc10g084170	ABRE	ACGTG	298	5	+	Arabidopsis thaliana	cis-acting element involved in the abscisic acid responsiveness
Solyc10g084170	ABRE	CACGTG	535	6	+	Arabidopsis thaliana	cis-acting element involved in the abscisic acid responsiveness
Solyc10g084170	ABRE	ACGTG	536	5	+	Arabidopsis thaliana	cis-acting element involved in the abscisic acid responsiveness
Solyc10g084170	Myb	TAACTG	280	6	-	Arabidopsis thaliana
Solyc10g084170	Myb	CAACTG	425	6	-	Arabidopsis thaliana
Solyc10g084170	Myb	TAACTG	795	6	+	Arabidopsis thaliana
Solyc10g084170	Unnamed__4	CTCC	5	4	-	Petroselinum hortense
Solyc10g084170	Unnamed__4	CTCC	112	4	-	Petroselinum hortense
Solyc10g084170	Unnamed__4	CTCC	1082	4	-	Petroselinum hortense
Solyc10g084170	Unnamed__4	CTCC	1130	4	+	Petroselinum hortense
Solyc10g084170	ABRE4	CACGTA	297	6	-	Zea mays
Solyc10g084170		motif_sequence	49	4	+	organism	short_function
Solyc10g084170		motif_sequence	261	4	+	organism	short_function
Solyc10g084170		motif_sequence	263	4	-	organism	short_function
Solyc10g084170		motif_sequence	561	4	+	organism	short_function
Solyc10g084170		motif_sequence	627	4	+	organism	short_function
Solyc10g084170		motif_sequence	784	4	+	organism	short_function
Solyc10g084170		motif_sequence	904	4	+	organism	short_function
Solyc10g084170		motif_sequence	959	4	-	organism	short_function
Solyc10g084170		motif_sequence	972	4	-	organism	short_function
Solyc10g084170		motif_sequence	978	4	-	organism	short_function
Solyc10g084170		motif_sequence	990	4	-	organism	short_function
Solyc10g084170		motif_sequence	1082	4	-	organism	short_function
Solyc10g084170		motif_sequence	1122	4	-	organism	short_function
Solyc10g084170		motif_sequence	1128	4	+	organism	short_function
Solyc10g084170		motif_sequence	1182	4	+	organism	short_function
Solyc10g084170		motif_sequence	1189	4	-	organism	short_function
Solyc10g084170		motif_sequence	1331	4	-	organism	short_function
Solyc10g084170		motif_sequence	1364	4	-	organism	short_function
Solyc10g084170	MBS	CAACTG	425	6	-	Arabidopsis thaliana	MYB binding site involved in drought-inducibility
Solyc10g084170	HSE1	TGAAGCTTCTGGAAT	1374	15	+	Arabidopsis thaliana
Solyc10g084170	MYB	CAACCA	731	6	+	Arabidopsis thaliana
Solyc10g084170	MYB	CAACCA	1244	6	-	Arabidopsis thaliana
Solyc10g084170	I-box	atGATAAGGTC	800	10	-	Helianthus annuus	part of a light responsive element
Solyc10g084170	I-box	TGATAATGT	801	9	-	Solanum tuberosum	part of a light responsive element
Solyc10g084170	G-Box	CACGTG	290	6	+	Pisum sativum	cis-acting regulatory element involved in light responsiveness
Solyc10g084170	G-Box	CACGTG	535	6	+	Pisum sativum	cis-acting regulatory element involved in light responsiveness
Solyc10g084170	AAGAA-motif	GAAAGAA	1255	7	+	Avena sativa
Solyc10g085290	AT~ABRE	TACGTGTC	758	8	+	Arabidopsis thaliana
Solyc10g085290	W box	TTGACC	215	6	+	Arabidopsis thaliana
Solyc10g085290	Unnamed__4	CTCC	1359	4	+	Petroselinum hortense
Solyc10g085290	ABRE	AACCCGG	445	7	+	Arabidopsis thaliana	cis-acting element involved in the abscisic acid responsiveness
Solyc10g085290	ABRE	TACGTGTC	758	8	+	Oryza sativa	cis-acting element involved in the abscisic acid responsiveness
Solyc10g085290	ABRE	ACGTG	759	5	+	Arabidopsis thaliana	cis-acting element involved in the abscisic acid responsiveness
Solyc10g085290	MYB	TAACCA	656	6	-	Arabidopsis thaliana
Solyc10g085290	AT1-motif	AATTATTTTTTATT	381	13	+	Solanum tuberosum	part of a light responsive module
Solyc10g085290	ABRE4	CACGTA	758	6	-	Zea mays
Solyc10g085290	AT~TATA-box	TATATA	120	6	+	Arabidopsis thaliana
Solyc10g085290	AT~TATA-box	TATATA	660	6	+	Arabidopsis thaliana
Solyc10g085290	AT~TATA-box	TATATA	1226	6	-	Arabidopsis thaliana
Solyc10g085290	ERE	ATTTCATA	134	8	+	Nicotiana glutinos
Solyc10g085290	ERE	ATTTCATA	745	8	+	Nicotiana glutinos
Solyc10g085290	ERE	ATTTTAAA	1428	8	+	Nicotiana glutinos
Solyc10g085290	Box 4	ATTAAT	579	6	+	Petroselinum crispum	part of a conserved DNA module involved in light responsiveness
Solyc10g085290	Box 4	ATTAAT	624	6	+	Petroselinum crispum	part of a conserved DNA module involved in light responsiveness
Solyc10g085290	Box 4	ATTAAT	688	6	+	Petroselinum crispum	part of a conserved DNA module involved in light responsiveness
Solyc10g085290	Box 4	ATTAAT	700	6	+	Petroselinum crispum	part of a conserved DNA module involved in light responsiveness
Solyc10g085290	Box 4	ATTAAT	934	6	-	Petroselinum crispum	part of a conserved DNA module involved in light responsiveness
Solyc10g085290	TCT-motif	TCTTAC	47	6	-	Arabidopsis thaliana	part of a light responsive element
Solyc10g085290	TCT-motif	TCTTAC	1487	6	-	Arabidopsis thaliana	part of a light responsive element
Solyc10g085290	MYC	CATTTG	220	6	-	Arabidopsis thaliana
Solyc10g085290	MYB-like sequence	TAACCA	656	6	-	Arabidopsis thaliana
Solyc10g085290	G-box	TACGTG	758	6	+	Arabidopsis thaliana	cis-acting regulatory element involved in light responsiveness
Solyc10g085290	HD-Zip 3	GTAAT(G/C)ATTAC	265	9.5	+	Arabidopsis thaliana	protein binding site
Solyc10g085290	TATA-box	TATAAAA	23	7	-	Pisum sativum	core promoter element around -30 of transcription start
Solyc10g085290	TATA-box	TATAAA	24	6	-	Helianthus annuus	core promoter element around -30 of transcription start
Solyc10g085290	TATA-box	TATAA	25	5	-	Arabidopsis thaliana	core promoter element around -30 of transcription start
Solyc10g085290	TATA-box	TATA	26	4	+	Arabidopsis thaliana	core promoter element around -30 of transcription start
Solyc10g085290	TATA-box	TATAAAT	90	7	-	Brassica juncea	core promoter element around -30 of transcription start
Solyc10g085290	TATA-box	TATAAA	91	6	-	Helianthus annuus	core promoter element around -30 of transcription start
Solyc10g085290	TATA-box	TATAA	92	5	-	Arabidopsis thaliana	core promoter element around -30 of transcription start
Solyc10g085290	TATA-box	TATA	93	4	+	Arabidopsis thaliana	core promoter element around -30 of transcription start
Solyc10g085290	TATA-box	ATATAT	119	6	+	Brassica napus	core promoter element around -30 of transcription start
Solyc10g085290	TATA-box	TATATA	120	6	+	Arabidopsis thaliana	core promoter element around -30 of transcription start
Solyc10g085290	TATA-box	ATATAA	121	6	+	Brassica oleracea	core promoter element around -30 of transcription start
Solyc10g085290	TATA-box	TATA	122	4	+	Arabidopsis thaliana	core promoter element around -30 of transcription start
Solyc10g085290	TATA-box	TATA	145	4	+	Arabidopsis thaliana	core promoter element around -30 of transcription start
Solyc10g085290	TATA-box	TATAAAA	191	7	-	Pisum sativum	core promoter element around -30 of transcription start
Solyc10g085290	TATA-box	TATAAA	192	6	-	Helianthus annuus	core promoter element around -30 of transcription start
Solyc10g085290	TATA-box	TATAA	193	5	-	Arabidopsis thaliana	core promoter element around -30 of transcription start
Solyc10g085290	TATA-box	TATA	194	4	+	Arabidopsis thaliana	core promoter element around -30 of transcription start
Solyc10g085290	TATA-box	ATATAA	248	6	+	Brassica oleracea	core promoter element around -30 of transcription start
Solyc10g085290	TATA-box	TATA	249	4	+	Arabidopsis thaliana	core promoter element around -30 of transcription start
Solyc10g085290	TATA-box	TATAA	276	5	-	Arabidopsis thaliana	core promoter element around -30 of transcription start
Solyc10g085290	TATA-box	TATA	277	4	+	Arabidopsis thaliana	core promoter element around -30 of transcription start
Solyc10g085290	TATA-box	TACATAAA	366	8	-	Oryza sativa	core promoter element around -30 of transcription start
Solyc10g085290	TATA-box	TATA	486	4	+	Arabidopsis thaliana	core promoter element around -30 of transcription start
Solyc10g085290	TATA-box	TATA	542	4	+	Arabidopsis thaliana	core promoter element around -30 of transcription start
Solyc10g085290	TATA-box	taTATAAAtc	592	9	-	Arabidopsis thaliana	core promoter element around -30 of transcription start
Solyc10g085290	TATA-box	TATAAAT	593	7	-	Brassica juncea	core promoter element around -30 of transcription start
Solyc10g085290	TATA-box	TATAAA	594	6	-	Helianthus annuus	core promoter element around -30 of transcription start
Solyc10g085290	TATA-box	TATAA	595	5	-	Arabidopsis thaliana	core promoter element around -30 of transcription start
Solyc10g085290	TATA-box	TATA	596	4	+	Arabidopsis thaliana	core promoter element around -30 of transcription start
Solyc10g085290	TATA-box	TATTTAAA	634	8	+	Arabidopsis thaliana	core promoter element around -30 of transcription start
Solyc10g085290	TATA-box	TATATAA	659	7	-	Arabidopsis thaliana	core promoter element around -30 of transcription start
Solyc10g085290	TATA-box	TATATA	660	6	+	Arabidopsis thaliana	core promoter element around -30 of transcription start
Solyc10g085290	TATA-box	TATA	662	4	+	Arabidopsis thaliana	core promoter element around -30 of transcription start
Solyc10g085290	TATA-box	ATTATA	682	6	+	Brassica napus	core promoter element around -30 of transcription start
Solyc10g085290	TATA-box	TATAA	683	5	-	Arabidopsis thaliana	core promoter element around -30 of transcription start
Solyc10g085290	TATA-box	TATA	684	4	+	Arabidopsis thaliana	core promoter element around -30 of transcription start
Solyc10g085290	TATA-box	TATAA	780	5	-	Arabidopsis thaliana	core promoter element around -30 of transcription start
Solyc10g085290	TATA-box	TATA	781	4	-	Arabidopsis thaliana	core promoter element around -30 of transcription start
Solyc10g085290	TATA-box	TATAAAA	907	7	-	Pisum sativum	core promoter element around -30 of transcription start
Solyc10g085290	TATA-box	TATAAA	908	6	-	Helianthus annuus	core promoter element around -30 of transcription start
Solyc10g085290	TATA-box	TATAA	909	5	-	Arabidopsis thaliana	core promoter element around -30 of transcription start
Solyc10g085290	TATA-box	TATA	910	4	-	Arabidopsis thaliana	core promoter element around -30 of transcription start
Solyc10g085290	TATA-box	ATTATA	1034	6	+	Brassica napus	core promoter element around -30 of transcription start
Solyc10g085290	TATA-box	TATAA	1035	5	-	Arabidopsis thaliana	core promoter element around -30 of transcription start
Solyc10g085290	TATA-box	TATA	1036	4	-	Arabidopsis thaliana	core promoter element around -30 of transcription start
Solyc10g085290	TATA-box	TATAA	1107	5	-	Arabidopsis thaliana	core promoter element around -30 of transcription start
Solyc10g085290	TATA-box	TATA	1108	4	-	Arabidopsis thaliana	core promoter element around -30 of transcription start
Solyc10g085290	TATA-box	ATTATA	1133	6	+	Brassica napus	core promoter element around -30 of transcription start
Solyc10g085290	TATA-box	TATAA	1134	5	-	Arabidopsis thaliana	core promoter element around -30 of transcription start
Solyc10g085290	TATA-box	TATA	1135	4	-	Arabidopsis thaliana	core promoter element around -30 of transcription start
Solyc10g085290	TATA-box	TACAAAA	1137	7	+	Oryza sativa	core promoter element around -30 of transcription start
Solyc10g085290	TATA-box	TATTTAAA	1158	8	-	Arabidopsis thaliana	core promoter element around -30 of transcription start
Solyc10g085290	TATA-box	TATTTAAA	1193	8	-	Arabidopsis thaliana	core promoter element around -30 of transcription start
Solyc10g085290	TATA-box	ATTATA	1224	6	+	Brassica napus	core promoter element around -30 of transcription start
Solyc10g085290	TATA-box	TATATAA	1225	7	-	Arabidopsis thaliana	core promoter element around -30 of transcription start
Solyc10g085290	TATA-box	TATATA	1226	6	-	Arabidopsis thaliana	core promoter element around -30 of transcription start
Solyc10g085290	TATA-box	TATA	1228	4	-	Arabidopsis thaliana	core promoter element around -30 of transcription start
Solyc10g085290	TATA-box	TATA	1351	4	-	Arabidopsis thaliana	core promoter element around -30 of transcription start
Solyc10g085290	TATA-box	ATTATA	1365	6	+	Brassica napus	core promoter element around -30 of transcription start
Solyc10g085290	TATA-box	TATAA	1366	5	-	Arabidopsis thaliana	core promoter element around -30 of transcription start
Solyc10g085290	TATA-box	TATA	1367	4	-	Arabidopsis thaliana	core promoter element around -30 of transcription start
Solyc10g085290	TATA-box	ATTATA	1446	6	+	Brassica napus	core promoter element around -30 of transcription start
Solyc10g085290	TATA-box	TATAA	1447	5	-	Arabidopsis thaliana	core promoter element around -30 of transcription start
Solyc10g085290	TATA-box	TATA	1448	4	-	Arabidopsis thaliana	core promoter element around -30 of transcription start
Solyc10g085290	TATA-box	TATAA	1472	5	-	Arabidopsis thaliana	core promoter element around -30 of transcription start
Solyc10g085290	TATA-box	TATA	1473	4	-	Arabidopsis thaliana	core promoter element around -30 of transcription start
Solyc10g085290	TATA-box	ATATAT	1477	6	-	Brassica napus	core promoter element around -30 of transcription start
Solyc10g085290	TATA-box	TATA	1478	4	-	Arabidopsis thaliana	core promoter element around -30 of transcription start
Solyc10g085290		motif_sequence	868	4	+	organism	short_function
Solyc10g085290		motif_sequence	1010	4	-	organism	short_function
Solyc10g085290		motif_sequence	1371	4	+	organism	short_function
Solyc10g085290	TCA	TCATCTTCAT	1369	9	+	Pisum sativum
Solyc10g085290	TATA	TATAAAAT	22	8	-	Arabidopsis thaliana
Solyc10g085290	TATA	TATAAAAT	781	8	+	Arabidopsis thaliana
Solyc10g085290	TATA	TATAAAAT	906	8	-	Arabidopsis thaliana
Solyc10g085290	MRE	AACCTAA	242	7	+	Petroselinum crispum	MYB binding site involved in light responsiveness
Solyc10g085290	MRE	AACCTAA	552	7	-	Petroselinum crispum	MYB binding site involved in light responsiveness
Solyc10g085290	MRE	AACCTAA	967	7	-	Petroselinum crispum	MYB binding site involved in light responsiveness
Solyc10g085290	GA-motif	ATAGATAA	803	8	+	Arabidopsis thaliana	part of a light responsive element
Solyc10g085290	CAAT-box	CAAAT	42	5	-	Pisum sativum	common cis-acting element in promoter and enhancer regions
Solyc10g085290	CAAT-box	CAAT	62	4	+	Nicotiana glutinosa
Solyc10g085290	CAAT-box	CAAT	88	4	+	Nicotiana glutinosa
Solyc10g085290	CAAT-box	CAAT	210	4	-	Nicotiana glutinosa
Solyc10g085290	CAAT-box	CAAAT	220	5	+	Pisum sativum	common cis-acting element in promoter and enhancer regions
Solyc10g085290	CAAT-box	CAAT	270	4	+	Nicotiana glutinosa
Solyc10g085290	CAAT-box	CAAAT	351	5	-	Pisum sativum	common cis-acting element in promoter and enhancer regions
Solyc10g085290	CAAT-box	CAAT	356	4	+	Nicotiana glutinosa
Solyc10g085290	CAAT-box	CAAT	392	4	-	Nicotiana glutinosa
Solyc10g085290	CAAT-box	CAAAT	464	5	-	Pisum sativum	common cis-acting element in promoter and enhancer regions
Solyc10g085290	CAAT-box	CAAAT	533	5	+	Pisum sativum	common cis-acting element in promoter and enhancer regions
Solyc10g085290	CAAT-box	CAAAT	588	5	-	Pisum sativum	common cis-acting element in promoter and enhancer regions
Solyc10g085290	CAAT-box	CAAT	612	4	+	Nicotiana glutinosa
Solyc10g085290	CAAT-box	CAAT	680	4	+	Nicotiana glutinosa
Solyc10g085290	CAAT-box	CAAT	787	4	-	Nicotiana glutinosa
Solyc10g085290	CAAT-box	CAAT	813	4	-	Nicotiana glutinosa
Solyc10g085290	CAAT-box	CAAT	829	4	+	Nicotiana glutinosa
Solyc10g085290	CAAT-box	CAAAT	1027	5	+	Pisum sativum	common cis-acting element in promoter and enhancer regions
Solyc10g085290	CAAT-box	CAAT	1066	4	-	Nicotiana glutinosa
Solyc10g085290	CAAT-box	CAAT	1092	4	-	Nicotiana glutinosa
Solyc10g085290	CAAT-box	CAAT	1283	4	+	Nicotiana glutinosa
Solyc10g085290	ABRE3a	TACGTG	758	6	+	Zea mays
Solyc10g085290	STRE	AGGGG	66	5	+	Arabidopsis thaliana
Solyc10g085290	STRE	AGGGG	666	5	-	Arabidopsis thaliana
Solyc10g085290	Unnamed__6	taTAAATATct	724	10	-	Zea mays
